# Supplementary material for: A broad view on the complexity involved in water oxidation catalysis based on Ru–bpn complexes
Source: Royal Society of Chemistry journal article supplement (doi:10.1039/d0dt03548c), 2020-01-01
Supplement: d0dt03548c1.pdf [file d0dt03548c1.pdf]

Electronic Supplementary Information for,

A broad view at the complexity involved in water oxidation  
catalysis based on Ru-bpn complexes

Abolfazl Ghaderian,<sup>1,2</sup> Alicja Franke,<sup>3</sup> Marcos Gil-Sepulcre,<sup>1</sup> Jordi Benet-Buchholz,<sup>1</sup> Antoni Llobet,<sup>1,4\*</sup> Ivana Ivanovic'-Burmazovic',<sup>3,5\*</sup> Carolina Gimbert-Suriñach,<sup>1\*</sup>

<sup>1</sup> Institute of Chemical Research of Catalonia (ICIQ), Barcelona Institute of Science and Technology, Av. Països Catalans 16, 43007 Tarragona, Spain.

<sup>2</sup> Departament de Química Física i Inorgànica, Universitat Rovira i Virgili, Campus Sescelades, C/Marcel·lí Domingo, s/n, 43007 Tarragona, Spain

<sup>3</sup> Department of Chemistry and Pharmacy, Friedrich-Alexander University Erlangen-Nuremberg, 91058 Erlangen, Germany

<sup>4</sup> Universitat Autònoma de Barcelona, Departament de Química, Cerdanyola del Vallès, 08193 Barcelona, Spain

<sup>5</sup> Department Chemie, Ludwigs-Maximilians-Universität, Butenandtstraße 5–13, 81377 München, Germany

## Table of Content

|                                                         |    |
|---------------------------------------------------------|----|
| Spectroscopy .....                                      | 3  |
| Nuclear Magnetic Resonance (NMR) .....                  | 3  |
| IR Spectroscopy .....                                   | 12 |
| UV-Vis .....                                            | 13 |
| Resonance Raman Spectroscopy .....                      | 15 |
| Kinetics and Thermodynamics .....                       | 16 |
| Electrochemistry in organic and aqueous solutions ..... | 21 |
| Crystallographic data.....                              | 26 |

# Spectroscopy

## Nuclear Magnetic Resonance (NMR)

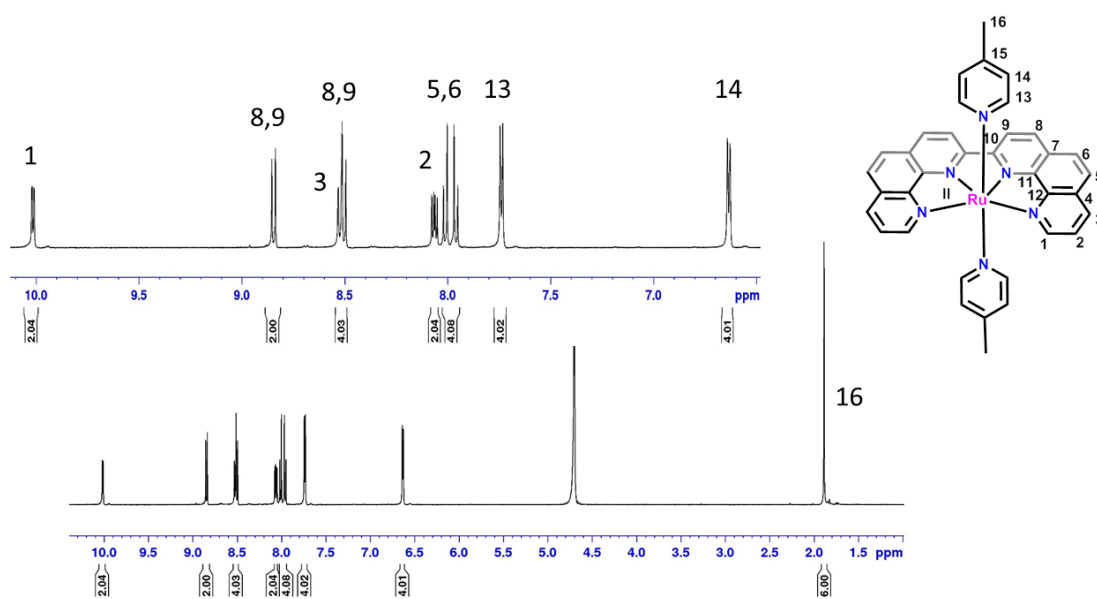

Figure S1.  $^1\text{H-NMR}$  spectrum of  $1^{2+}$  in  $\text{D}_2\text{O}$  at  $T = 298\text{K}$ . Inset, enlargement of aromatic region.

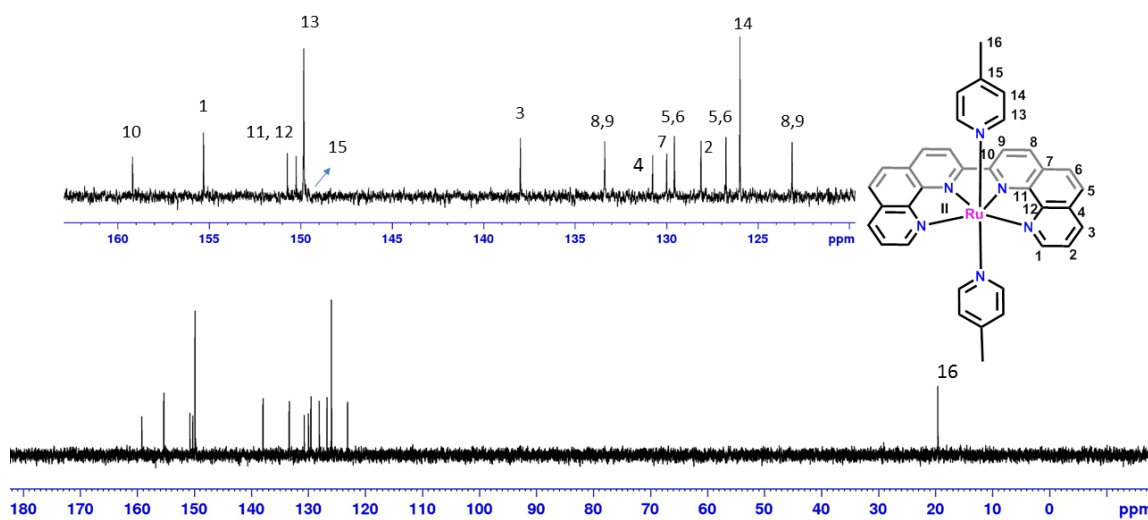

Figure S2.  $^{13}\text{C}\{^1\text{H}\}$  NMR of  $1^{2+}$  in  $\text{D}_2\text{O}$  at  $T = 298\text{K}$ . Inset, enlargement of aromatic

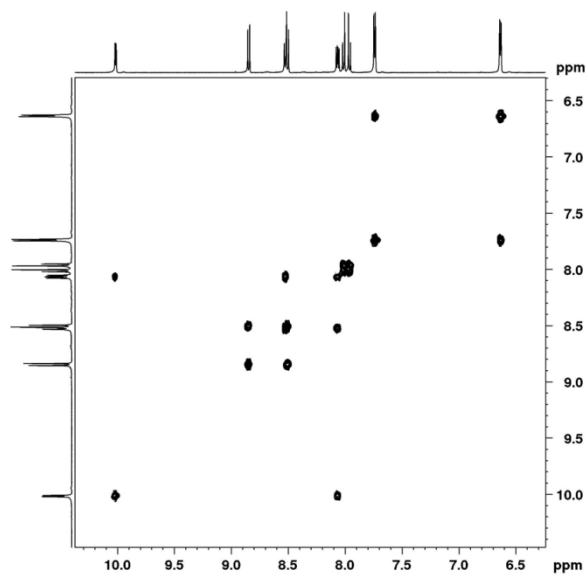

**Figure S3.** <sup>1</sup>H-<sup>1</sup>H COSY of **1**<sup>2+</sup> in D<sub>2</sub>O at T = 298K.

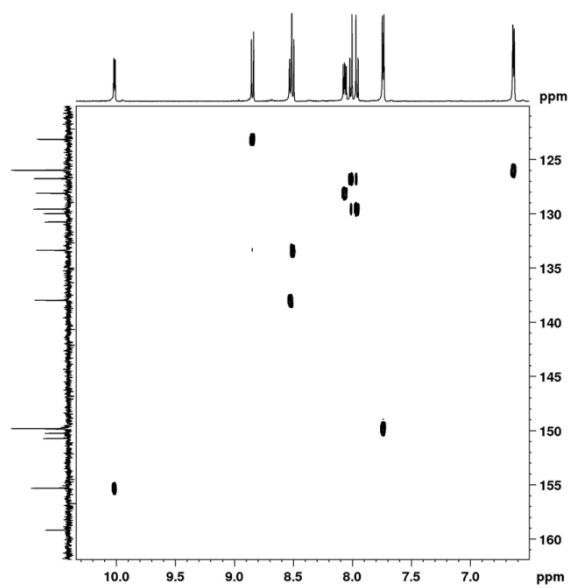

**Figure S4.** <sup>1</sup>H-<sup>13</sup>C HSQC NMR of **1**<sup>2+</sup> in D<sub>2</sub>O at T = 298K.

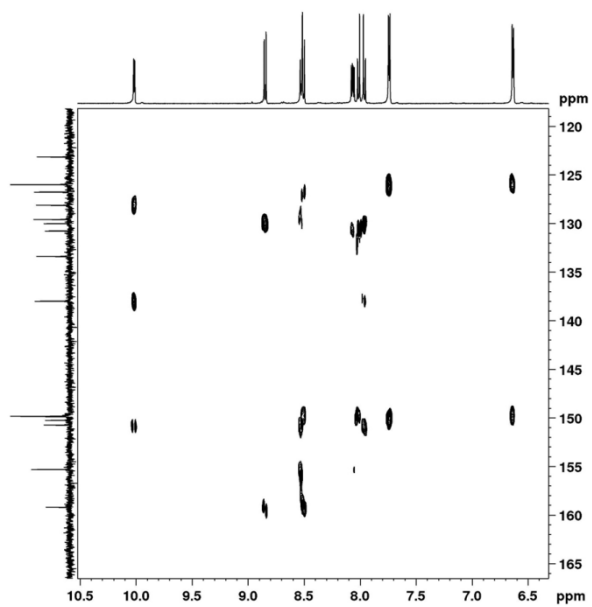

**Figure S5.**  $^1\text{H}$ - $^{13}\text{C}$  HMBC NMR of  $\mathbf{1}^{2+}$  in  $\text{D}_2\text{O}$  at  $T=298\text{K}$ .

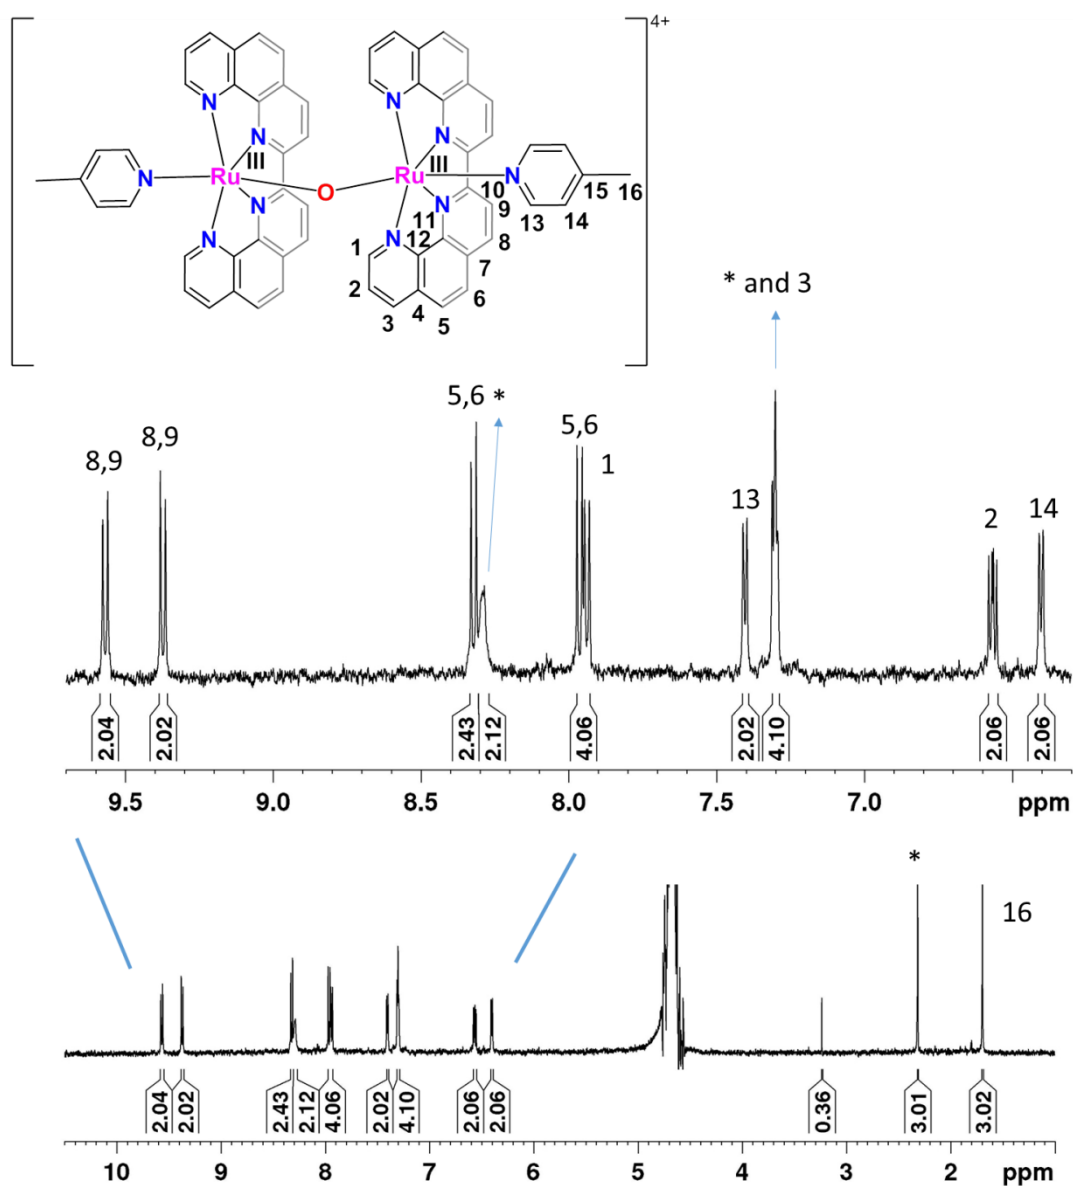

**Figure S6.**  $^1\text{H-NMR}$  spectrum of electrochemically generated  $3^{4+}$  from  $1^{2+}$  in a phosphate buffer (phbf) aqueous solution at pH 7 see (Figure S28 for CPE details). Asterisks indicate resonances of free picoline. *Inset*, enlargement of the aromatic region.

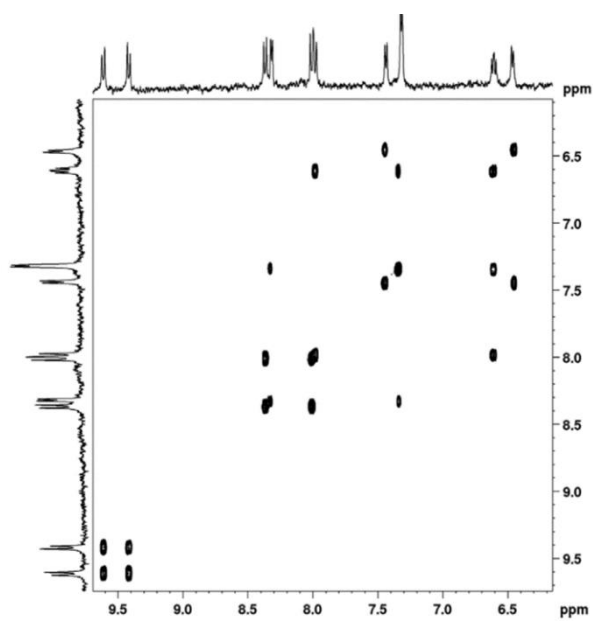

**Figure S7.** <sup>1</sup>H-<sup>1</sup>H COSY of **3<sup>4+</sup>** in a phbf aqueous solution at pD 7.

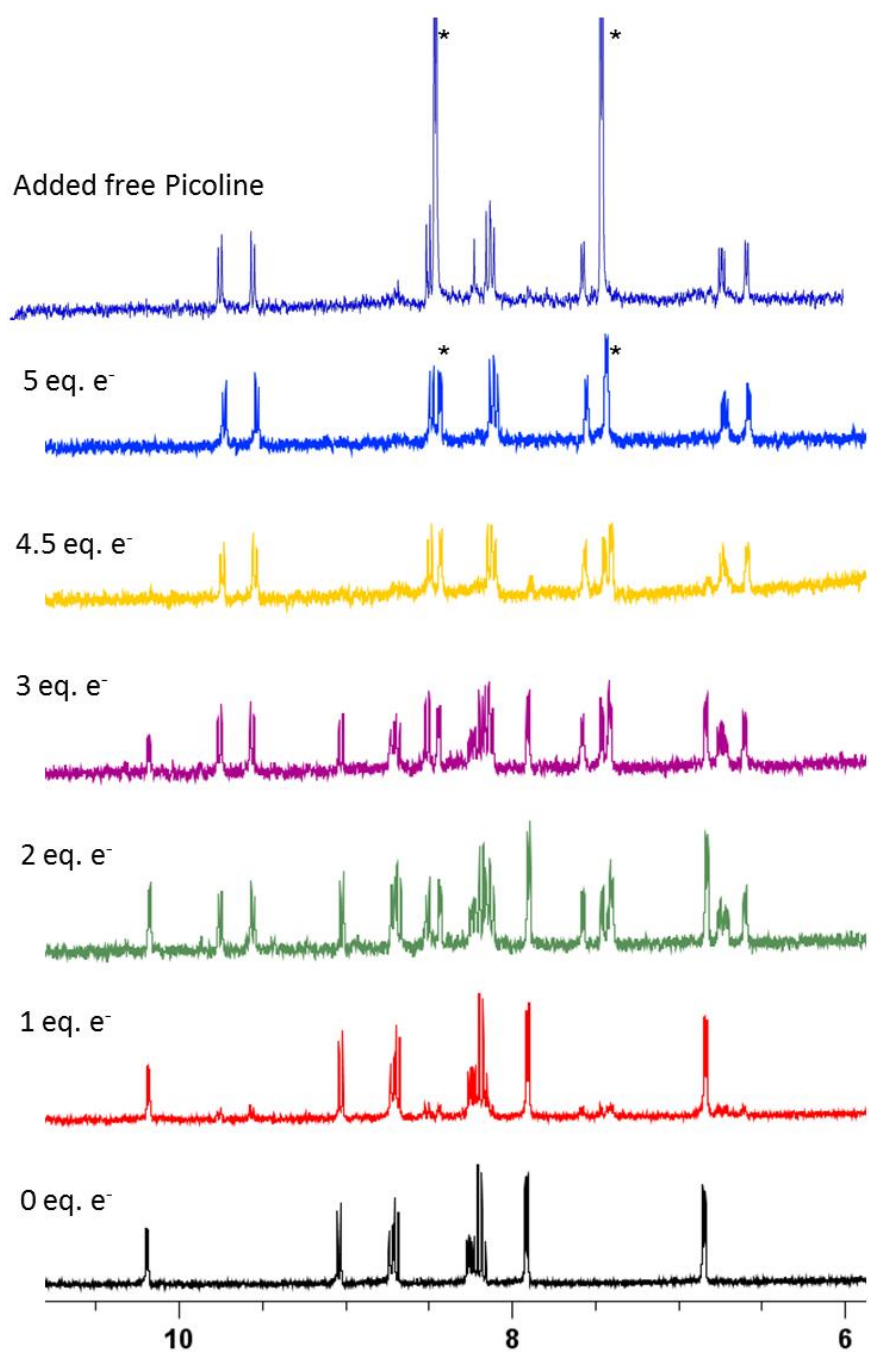

**Figure S8.**  $^1\text{H-NMR}$  monitoring of the electrochemical conversion of  $1^{2+}$  into  $3^{4+}$  in a phbf solution at pH 7 (see Figure S28 for CPE details). Asterisks indicate resonances of free picoline.



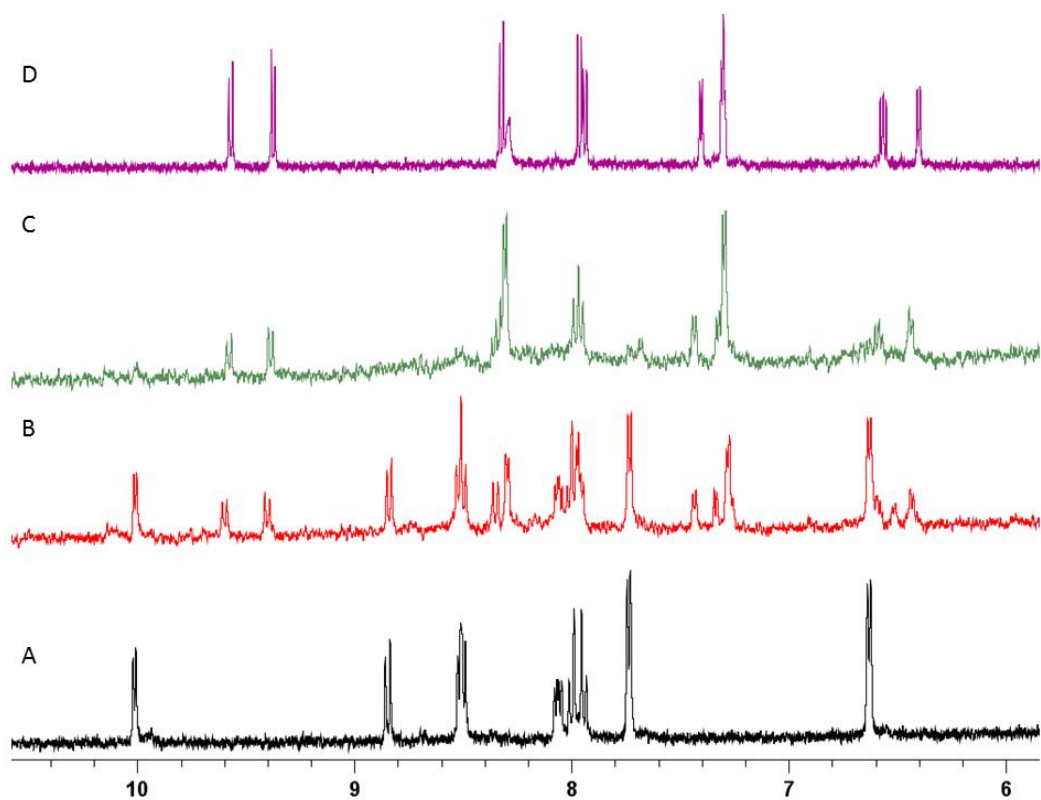

**Figure S9.**  $^1\text{H}$ -NMR spectra in a phbf aqueous solution at pD 7 of: A)  $\mathbf{1}^{2+}$ , B)  $\mathbf{1}^{2+} + 2 \text{ eq. NaIO}_4$ , C)  $\mathbf{1}^{2+} + 4.5 \text{ eq. NaIO}_4$  and D)  $\mathbf{3}^{4+}$  after CPE at  $E_{\text{app}}=1.45 \text{ V vs. NHE}$ .

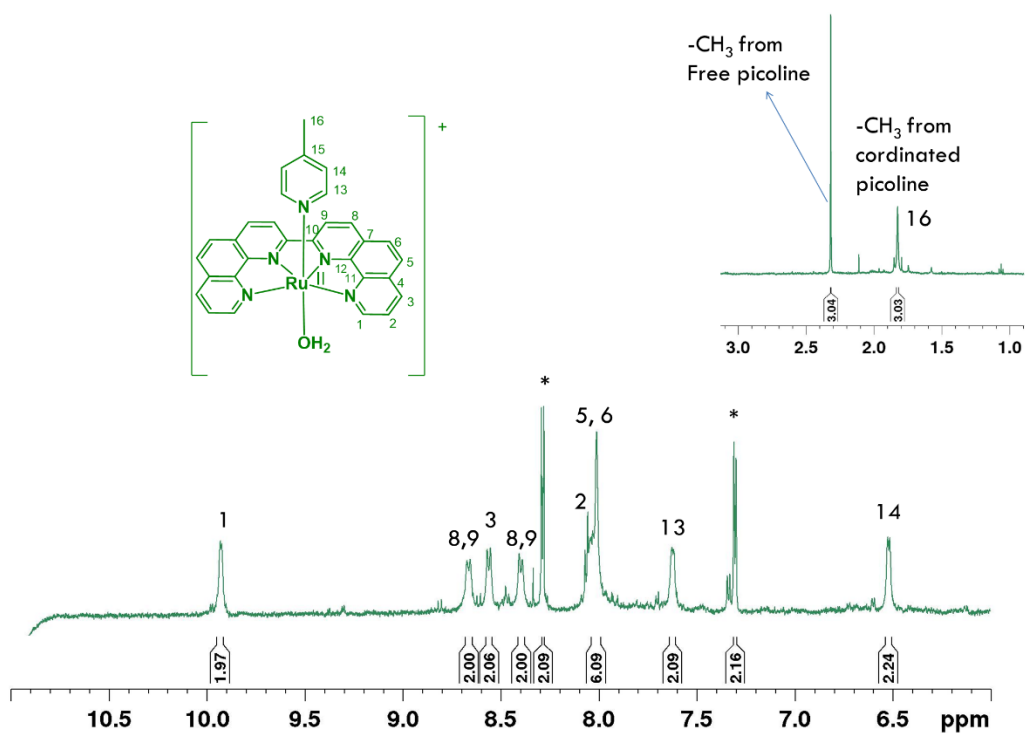

**Figure S10.**  $^1\text{H}$ -NMR spectrum of electrochemically generated  $4^{2+}$  from  $3^{4+}$  in a phbf aqueous solution at pH 7 (see Figure S29 for CPE details). Asterisks indicate resonances of free picoline. Inset, enlargement of the aliphatic region.

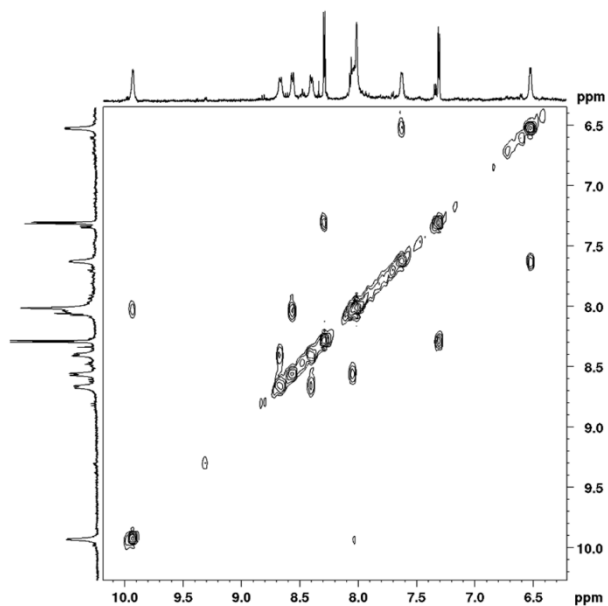

**Figure S11.**  $^1\text{H}$ - $^1\text{H}$  COSY of  $4^{2+}$  at pH 7 at  $T = 298\text{K}$ .

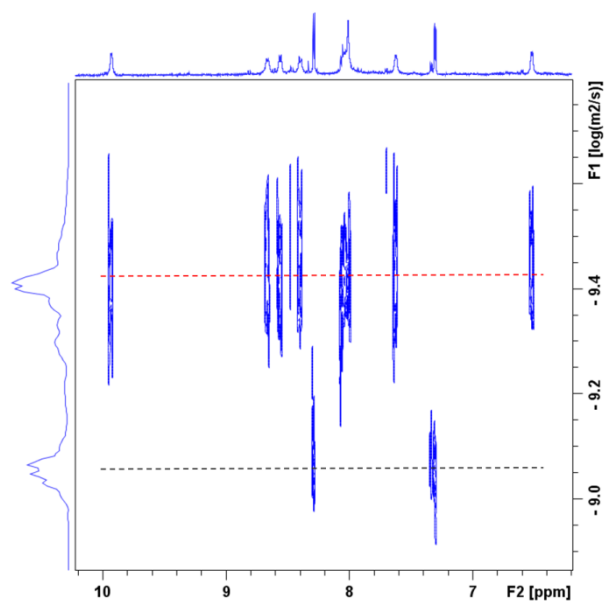

**Figure S12.** DOSY of  $4^{2+}$  at pD 7. Free picoline appears at  $\log D = -9.05$ .

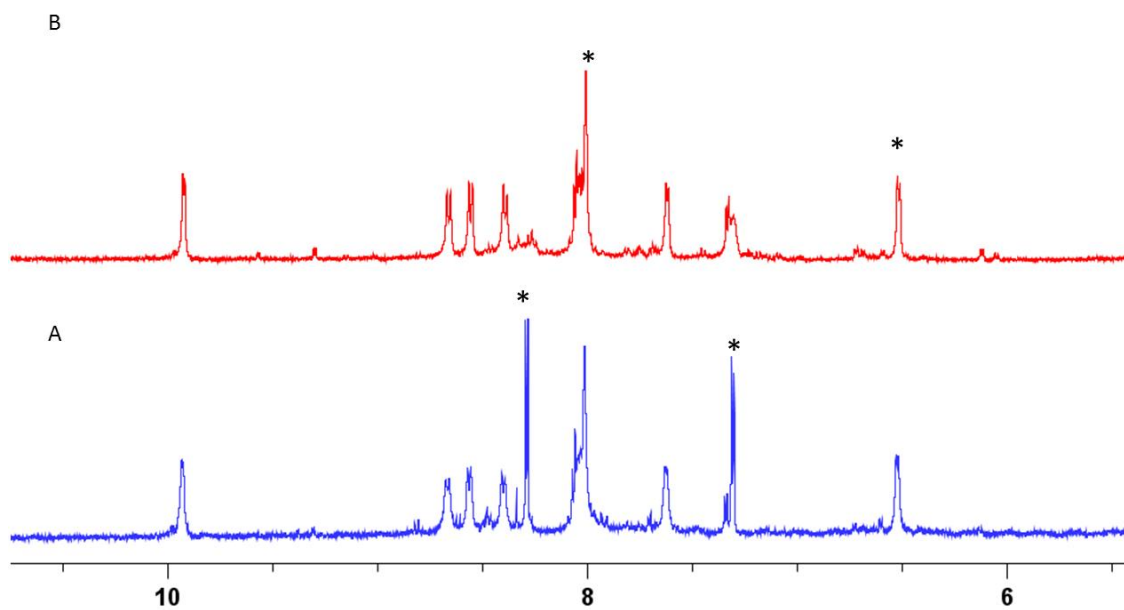

**Figure S13.**  $^1\text{H-NMR}$  spectra of electrochemically (CPE at  $E_{\text{app}} = 0.35$  in a solution of  $3^{4+}$ ) A) and chemically (addition of L-ascorbic acid) B), generated  $4^{2+}$  at pD 7. Asterisk indicate resonances of free picoline.

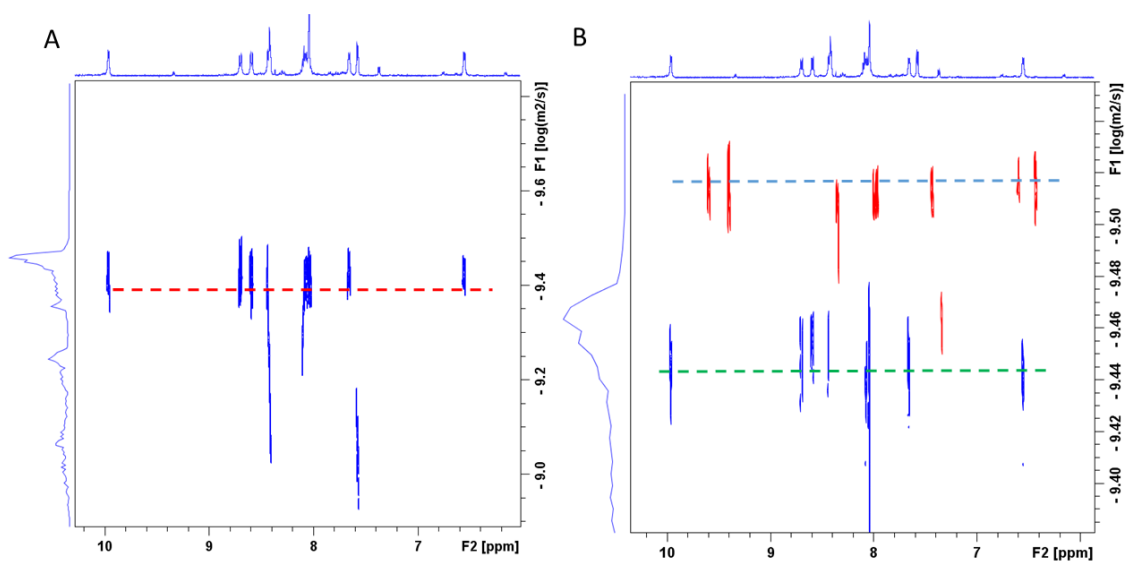

**Figure S14.** DOSY at pD 7 of: A)  $4^{2+}$  and B)  $4^{2+}$  (blue trace) +  $3^{4+}$  (red trace).

### IR Spectroscopy

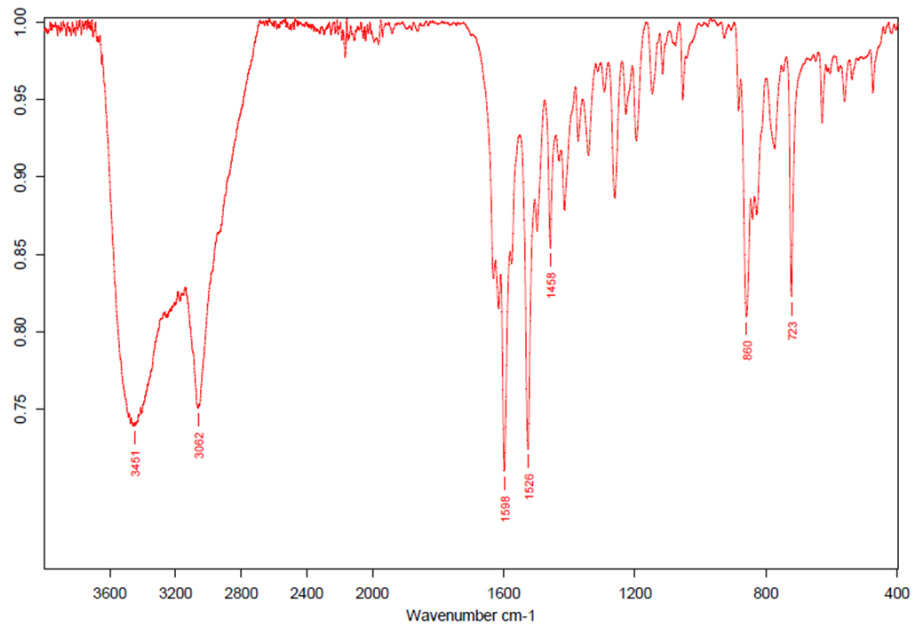

**Figure S15.** IR spectrum of  $[\text{Ru}(\text{bpn})(\text{Cl})_2]\text{Cl}$ .

## UV-Vis

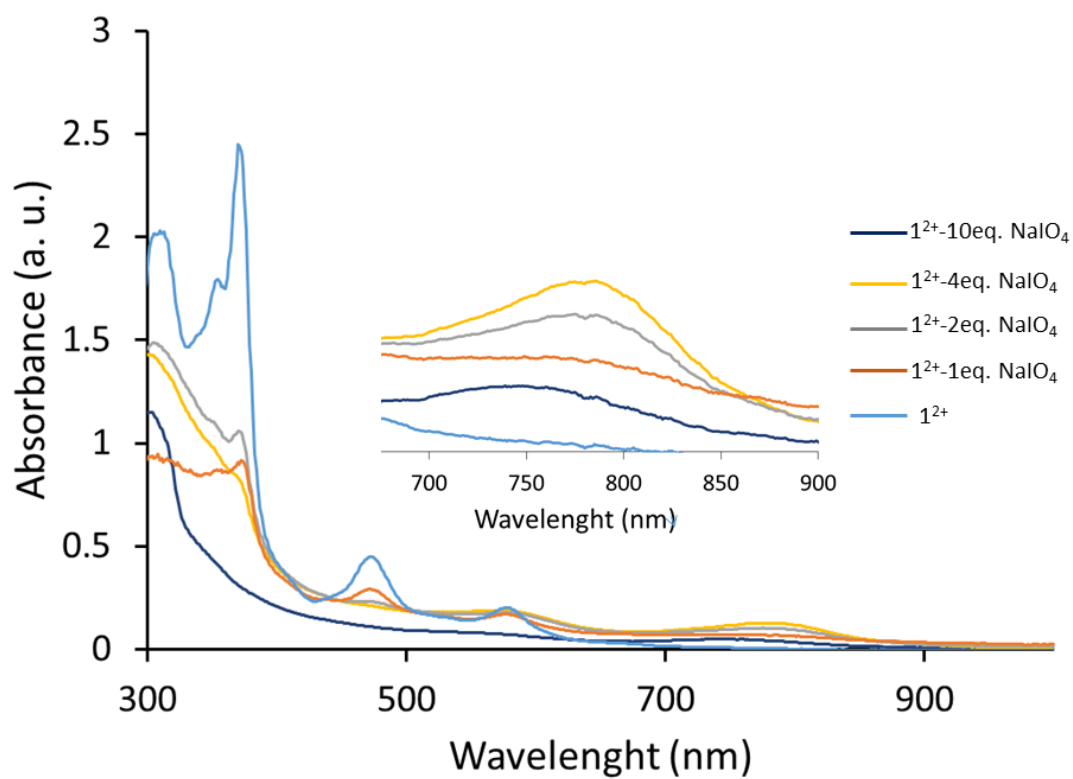

**Figure S16.** Recorded UV-vis spectra in a solution of  $1^{2+}$  (1mM) after addition of 1 to 10 eq of  $\text{NaIO}_4$  in a phbf aqueous solution at pH 7. Inset enlargement of the 700-900 nm region.

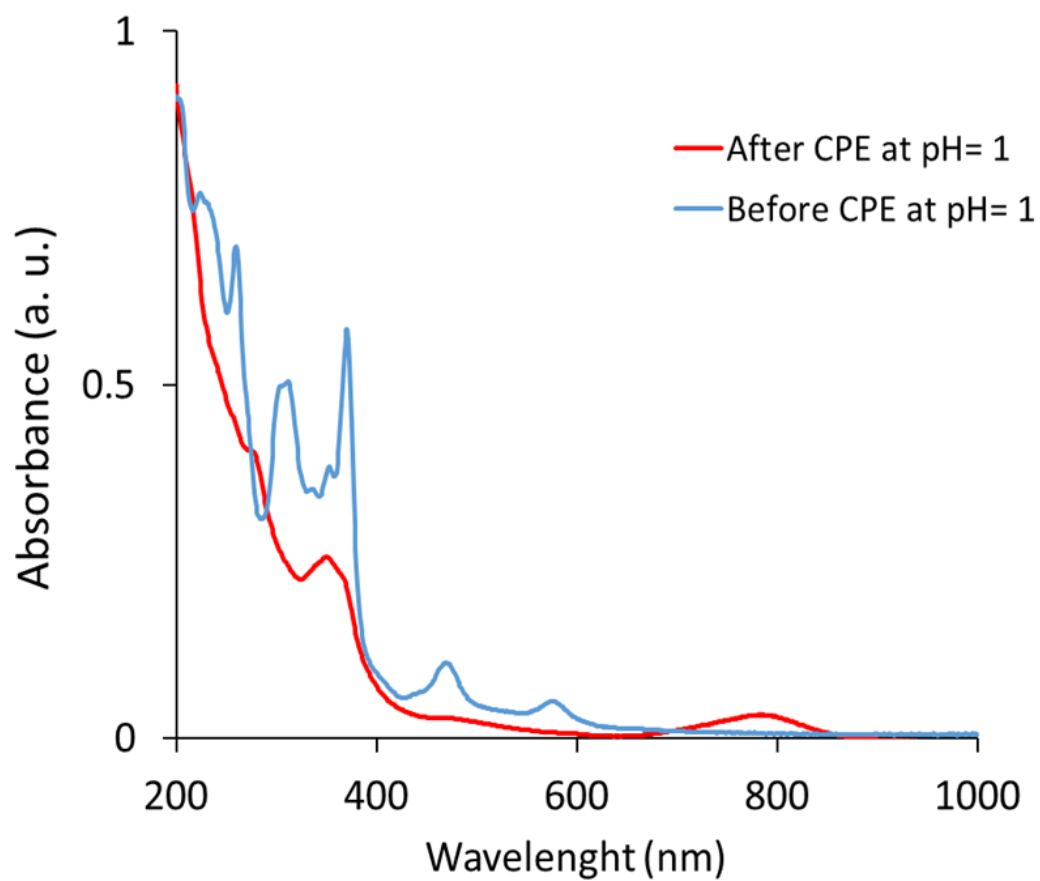

**Figure S17.** Recorded UV-vis spectra of  $\mathbf{1}^{2+}$  (blue color) and new compound (red color) after CPE at  $E_{\text{app}} = 1.65$  V in a 1 mM solution of  $\mathbf{1}^{2+}$  at pH 1 (TA-TFE (2:1) ( $[\text{TA}] = 0.1$  M)).

## Resonance Raman Spectroscopy

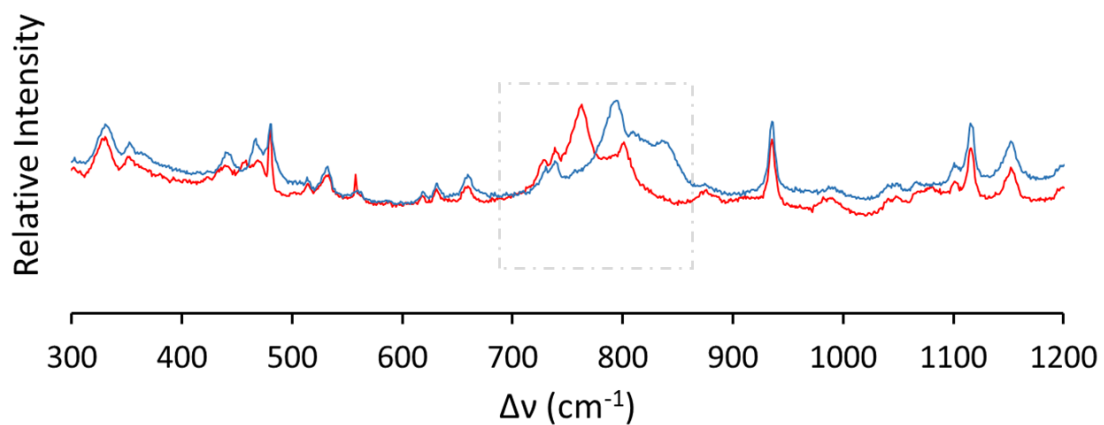

**Figure S18.** rRaman spectra of an aqueous solution of  $\mathbf{3}^{4+}$  prepared *in situ* from  $\mathbf{1}^{2+}$  after a CPE electrolysis at  $E_{\text{app}} = 1.45$  V at pH 7 phbf solution in  $\text{H}_2\text{O}^{16}$  (blue) and  $\text{H}_2\text{O}^{18}$  (red).

## Kinetics and Thermodynamics

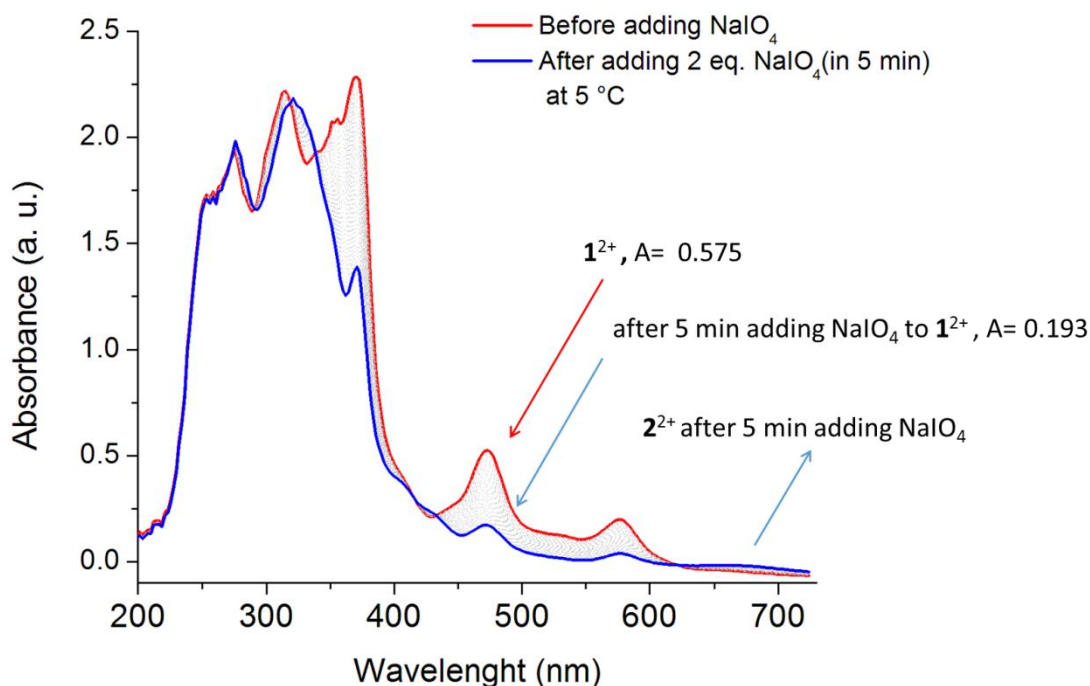

**Figure S19.** Spectral changes recorded after stopped-flow mixing (1:1 volume ratio, 113  $\mu\text{l}$  of each reagent) of  $8 \times 10^{-4}$  mM  $\text{NaIO}_4$  with  $4 \times 10^{-4}$  mM solution of  $1^{2+}$  in phbf at pH 7.2 and 5 °C. 0 min (Red color ( $1^{2+}$ )) and 5 min (blue color ( $2^{2+}$ )). The gray traces show the spectral changes every 10 seconds.

**Table S1.**  $[\text{NaIO}_4]$ ,  $k_{\text{obs}1}$  with St. deviation (SD) for  $k_{\text{obs}1}$  and SD for the fits taken from Figure 4C

| $[\text{NaIO}_4]$ , M  | Mean value of $k_{\text{obs}1}$ ( $\text{s}^{-1}$ ) | SD of $k_{\text{obs}1}$ | SD of fits                       |
|------------------------|-----------------------------------------------------|-------------------------|----------------------------------|
| $8.75 \times 10^{-5}$  | 0.0274                                              | 0.00185                 | $(2.718 - 4.073) \times 10^{-4}$ |
| $1.125 \times 10^{-4}$ | 0.0376                                              | 0.00435                 | $(3.370 - 5.147) \times 10^{-4}$ |
| $1.50 \times 10^{-4}$  | 0.0452                                              | 0.00338                 | $(3.621 - 4.008) \times 10^{-4}$ |
| $2.00 \times 10^{-4}$  | 0.0582                                              | 0.00399                 | $(3.919 - 4.166) \times 10^{-4}$ |
| $2.5 \times 10^{-4}$   | 0.0757                                              | 0.00713                 | $(3.994 - 4.132) \times 10^{-4}$ |



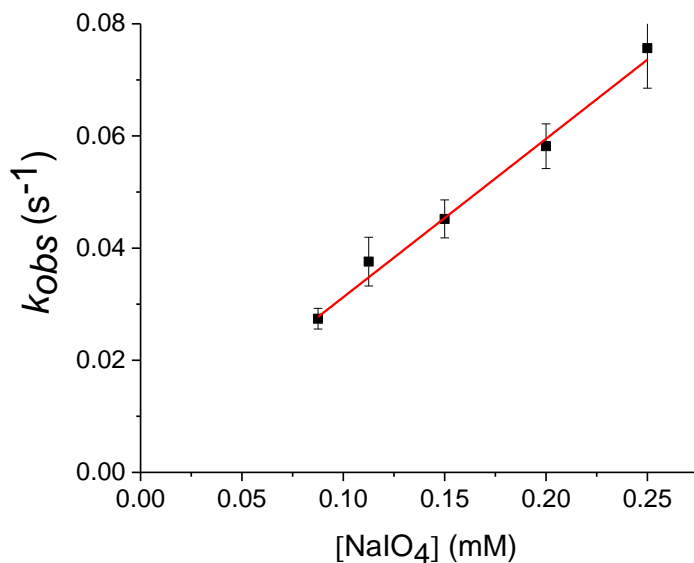

**Figure S20.** Linear plot of  $k_{obs1}$  ( $s^{-1}$ ) values vs.  $[NaIO_4]$ . 7–20 equivalent excesses of  $NaIO_4$  ( $[NaIO_4] = (0.875 - 2.5) \times 10^{-4}$  M) used over the concentration of  $1^{2+}$  ( $0.125 \times 10^{-4}$  M) at pH 7.2 phbf solution and 25 °C. The values of  $k_{obs1}$  ( $s^{-1}$ ) were obtained from the experimental data shown in Fig. 4C. The regression parameters to linear function  $y = ax + b$ ,  $a = 295.44 \pm 10.31$ ,  $b = 0.0013 \pm 0.0016$ ,  $R^2 = 0.9952$ .

**Table S2.** Spectroscopic data for the calculation of  $[2^{2+}]$  is taken from Figure S19.

| $\Delta A [1^{2+}]$ | $\epsilon (1^{2+})$           | L    | $[2^{2+}] = \Delta A/\epsilon L$ |
|---------------------|-------------------------------|------|----------------------------------|
| 0.382               | 6472.52 $M^{-1}\cdot cm^{-1}$ | 1 cm | $5.9 \times 10^{-5}$ M           |

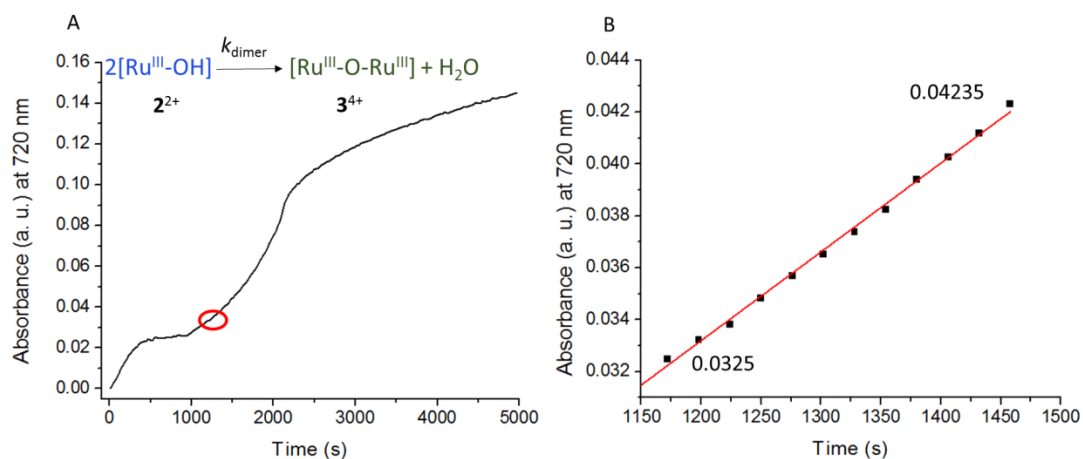

**Figure S21.** Left, Kinetic traces recorded at 720 nm during 82 min after stopped-flow mixing (1:1 volume ratio, 113  $\mu\text{l}$  of each reagent) of  $8 \times 10^{-4}$  mM  $\text{NaIO}_4$  with  $4 \times 10^{-4}$  mM solution of  $2^{2+}$  in phbf at pH 7.2 and 5  $^\circ\text{C}$ . Right, enlargement of the 1170-1460 s zone used for the calculation of  $3^{4+}$ . Fit of experimental data to the linear function  $y = ax + b$ ;  $a = 3.419 \times 10^{-5} \pm 5.162 \times 10^{-7}$ ;  $b = -7.8 \times 10^{-3} \pm 6.7 \times 10^{-4}$ ;  $R^2 = 0.9975$ .

**Table S3.** Spectroscopic data for the calculation of  $k_{\text{dimer}}$  for the dimerization reaction (optical path length used,  $L = 1$  mm). The data is taken from Figure S21.

| $\epsilon(3^{4+})$                   | Slope = $\Delta C/\Delta t$                     | $v_{\text{initial}} = \text{slope}/\epsilon_{\text{dim}} \cdot L$ | $[2^{2+}]$                    | $k_{\text{dimer}} = v_{\text{initial}}/[2^{2+}]^2$ |
|--------------------------------------|-------------------------------------------------|-------------------------------------------------------------------|-------------------------------|----------------------------------------------------|
| 7281.6                               | $(3.42 \pm 0.05) \times 10^{-5} \text{ s}^{-1}$ | $(4,696 \pm 0.069) \times 10^{-9} \text{ M s}^{-1}$               | $5.9 \cdot 10^{-5} \text{ M}$ | $1.349 \pm 0.020 \text{ M}^{-1} \text{ s}^{-1}$    |
| $\text{M}^{-1} \cdot \text{cm}^{-1}$ |                                                 |                                                                   |                               |                                                    |

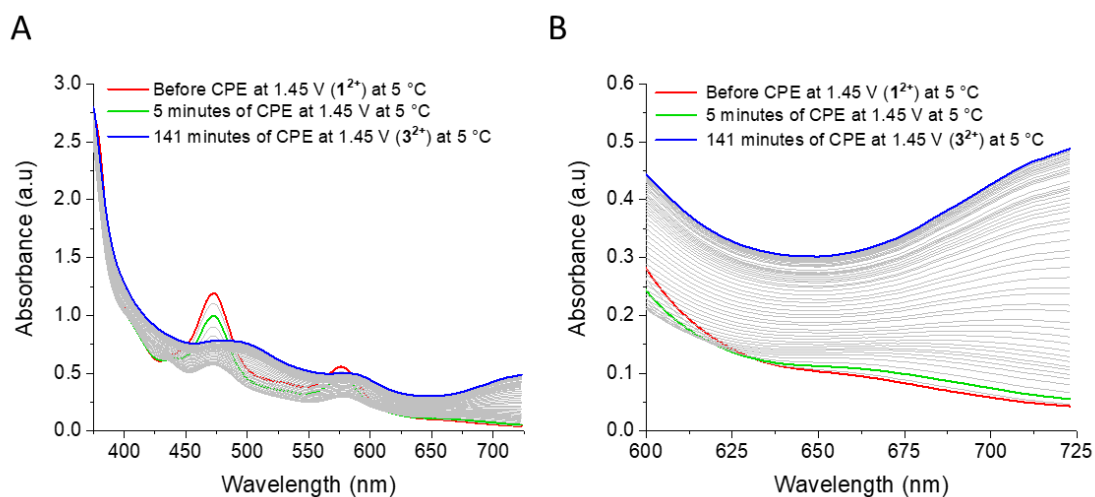

**Figure S22.** Spectral changes recorded with UV-Vis probe during a CPE at  $E_{app} = 1.45$  V in a phosphate buffer solution at pH 7 ( $T = 5$  °C), Red ( $1^{2+}$ ), Green ( $2^{2+}$ ), Blue ( $3^{4+}$ ). Conditions: 50 mL of buffered solution (phbf, pH = 7) of  $1^{2+}$  ( $[1^{2+}] = 0.2$  mM,  $10$   $\mu$ mol). WE: Pt net electrode (simple cylindrical Pt wire electrode, diameter: 35 mm and cylinder height: 50 mm); CE: Pt wire; RE: silver wire, the potential reported vs. NHE.

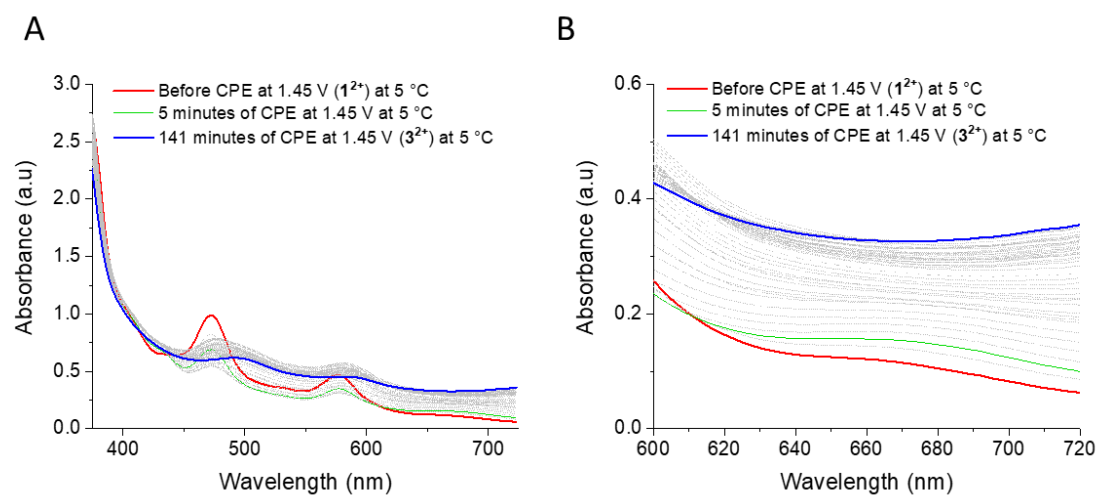

**Figure S23.** Spectral changes recorded with UV-Vis probe before (red) and after (blue) a CPE at  $E_{app} = 1.45$  V in a phosphate buffer solution at pH 9 ( $T = 5$  °C). Conditions: 50 ml of buffered solution (sodium borate buffer, pH 9) of  $1^{2+}$  ( $[1^{2+}] = 0.2$  mM,  $10$   $\mu$ mol). WE: Pt net electrode (simple cylindrical Pt wire electrode, diameter: 35 mm and cylinder height: 50 mm); CE: Pt wire; RE: silver wire, the potential reported vs. NHE.

The equilibrium concentrations of  $\text{Ru}^{\text{III}}\text{-O-}^{\text{III}}\text{Ru}^{4+}$ ,  $[\text{Ru}^{\text{III}}\text{-O-}^{\text{III}}\text{Ru}^{4+}]_e$ , were calculated from the spectral changes after adding various concentrations of oxidant ( $\text{NaIO}_4$ ) and the known dimer extinction coefficient at  $\lambda = 791 \text{ nm}$  ( $7281.6 \text{ M}^{-1}\cdot\text{mm}^{-1}$ ). In order to calculate  $[\text{Ru}^{\text{III}}\text{-OH}^{2+}]_e$ , first the starting concentration of  $\text{Ru}^{\text{III}}\text{-OH}^{2+}$ ,  $[\text{Ru}^{\text{III}}\text{-OH}^{2+}]_o$ , was calculated from spectral changes of  $[\mathbf{1}^{2+}]$  after adding various amounts of oxidant and the known extinction coefficient of  $\mathbf{1}^{2+}$  at  $\lambda = 472 \text{ nm}$  ( $\epsilon = 6472.52 \text{ M}^{-1}\cdot\text{mm}^{-1}$ ). Then,  $[\text{Ru}^{\text{III}}\text{-OH}^{2+}]_e$  was calculated from Eq S1 (Table S4).

$$[\text{Ru}^{\text{III}}\text{-OH}^{2+}]_e = [\text{Ru}^{\text{III}}\text{-OH}^{2+}]_o - 2 [\text{Ru}^{\text{III}}\text{-O-}^{\text{III}}\text{Ru}^{4+}]_e \quad (\text{Eq. S1})$$

**Table S4.** Absorbance changes for after addition of various concentrations of oxidant  $\text{NaIO}_4$  to  $\mathbf{1}^{2+}$ .

| $\mathbf{1}^{2+}:\text{NaIO}_4$ | A (471 nm)<br>( $\mathbf{1}^{2+}$ ) | $\Delta A$ (at 471 nm)<br>( $\mathbf{2}^{2+}$ ) | $\Delta A$ (at 791 nm)<br>( $\mathbf{3}^{4+}$ ) |
|---------------------------------|-------------------------------------|-------------------------------------------------|-------------------------------------------------|
| 1-0.5                           | 0.616                               | 0.570                                           | 0.02032                                         |
| 1-1                             | 0.621                               | 0.4883                                          | 0.0405                                          |
| 1-2                             | 0.605                               | 0.3081                                          | 0.12150                                         |
| 1-3                             | 0.564                               | 0.1852                                          | 0.12239                                         |

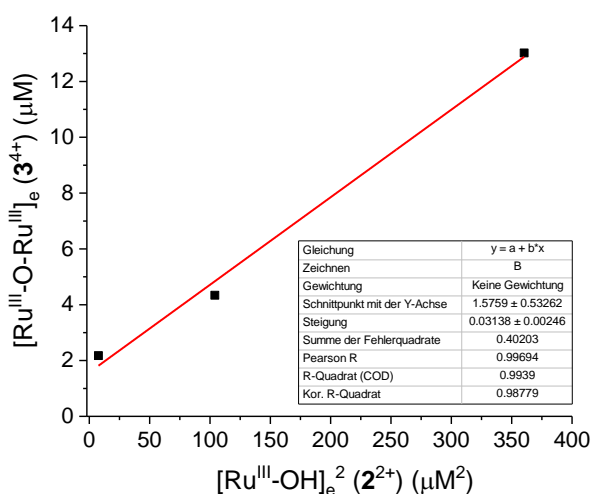

**Figure S24.** Linear plot of  $[\text{Ru}^{\text{III}}\text{-O-}^{\text{III}}\text{Ru}^{4+}]_e$  ( $[\mathbf{3}^{4+}]_e$ ) vs.  $[\text{Ru}^{\text{III}}\text{-OH}^{2+}]_e^2$ , ( $[\mathbf{2}^{2+}]_e^2$ ) to estimate the value of equilibrium constant  $K_e$  for the dimerization reaction.

## Electrochemistry in organic and aqueous solutions

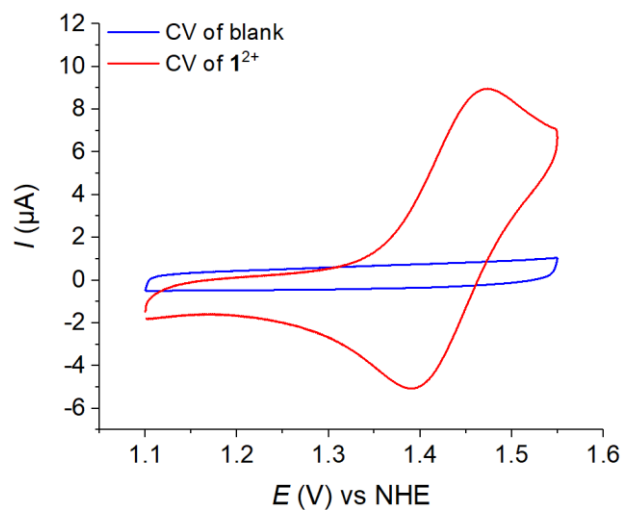

**Figure S25.** CV of  $1^{2+}$  (1 mM) in a solution of TFE and 0.1 M  $(\text{Bu}_4\text{N})\text{PF}_6$  at scan rate of 100 mV/s  
WE: glassy carbon electrode; CE: platinum electrode; RE:  $\text{Hg}/\text{Hg}_2\text{SO}_4$ .

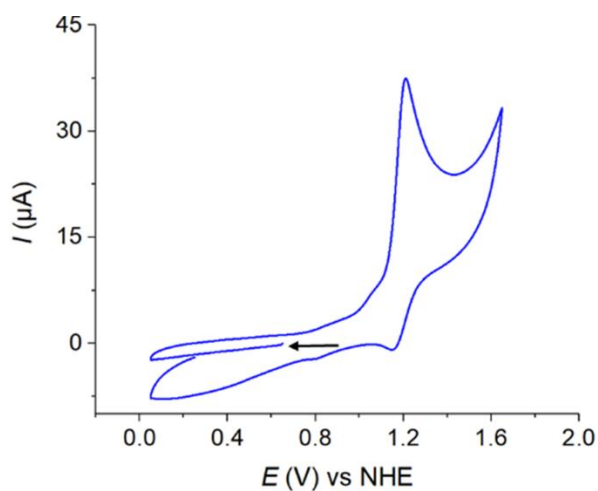

**Figure S26.** CV of  $1^{2+}$  in a phbf aqueous solution at pH 7 in cathodic direction. Conditions:  $[1^{2+}]$ : 1mM, scan rate: 100 mV/s. WE: glassy carbon electrode; CE: platinum electrode; RE:  $\text{Hg}/\text{Hg}_2\text{SO}_4$ .  
Black arrows show the scan direction.

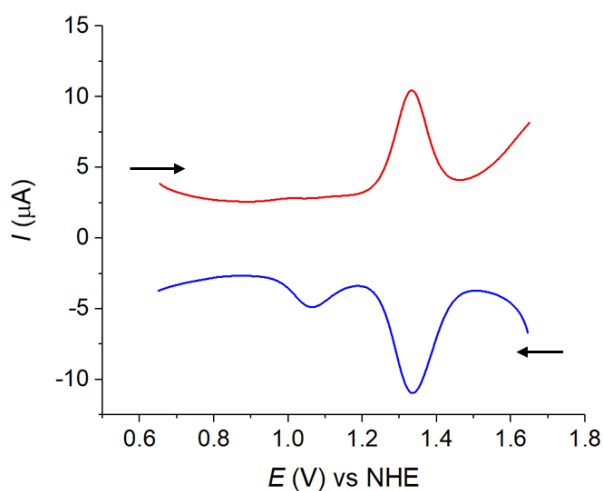

**Figure S27.** DPV of  $1^{2+}$  in anodic (red line) and cathodic (blue line) directions. WE: glassy carbon electrode; CE: platinum electrode; RE: Hg/Hg<sub>2</sub>SO<sub>4</sub>. Black arrows show the scan direction.

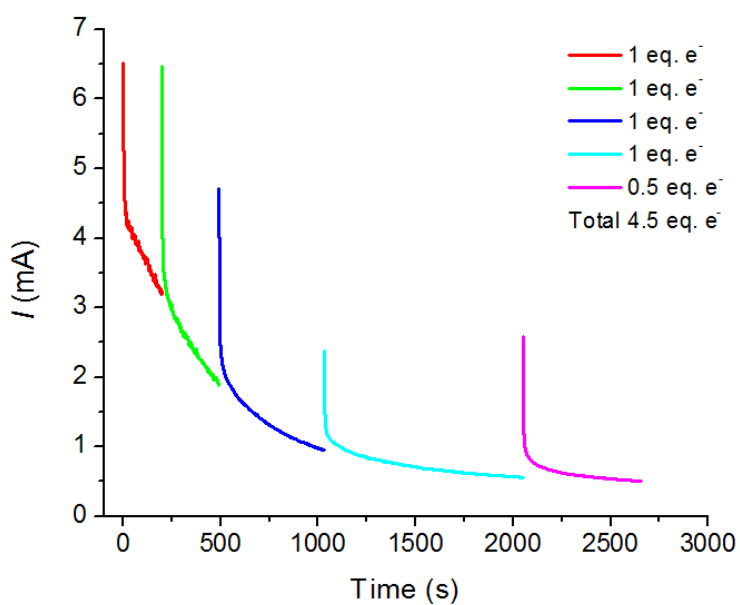

**Figure S28.** CPE at  $E_{app} = 1.45$  V vs. NHE of a solution of  $1^{2+}$  (1.34 mM, 5 mL, pH 7 phbf; 6.7  $\mu$ mols) using a Pt net electrode (simple cylindrical Pt net electrode, diameter: 10 mm and cylinder height: 30 mm) as a working electrode, Hg/Hg<sub>2</sub>SO<sub>4</sub> as reference electrode and a Pt mesh as auxiliary electrode (simple square mesh net 20\*20 mm). The charge passed was integrated to be 3.37 C, giving 5 equivalents of electrons.

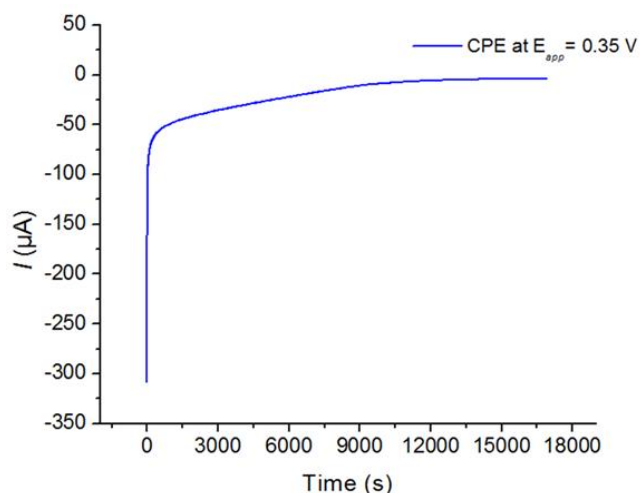

**Figure S29.** CPE at  $E_{\text{app}} = 0.35$  V vs. NHE of a solution of  $\mathbf{3}^{4+}$  (0.67 mM, 2 mL, pH 7 phbf; 1.34  $\mu\text{mol}$ ) using a Pt net electrode (simple cylindrical Pt net electrode, diameter: 10 mm and cylinder height: 30 mm) as a working electrode, Hg/Hg<sub>2</sub>SO<sub>4</sub> as reference electrode and a Pt mesh as auxiliary electrode (simple square mesh net 20\*20 mm). The charge passed was integrated to be 0.32 C, giving 2.5 equivalents of electrons.

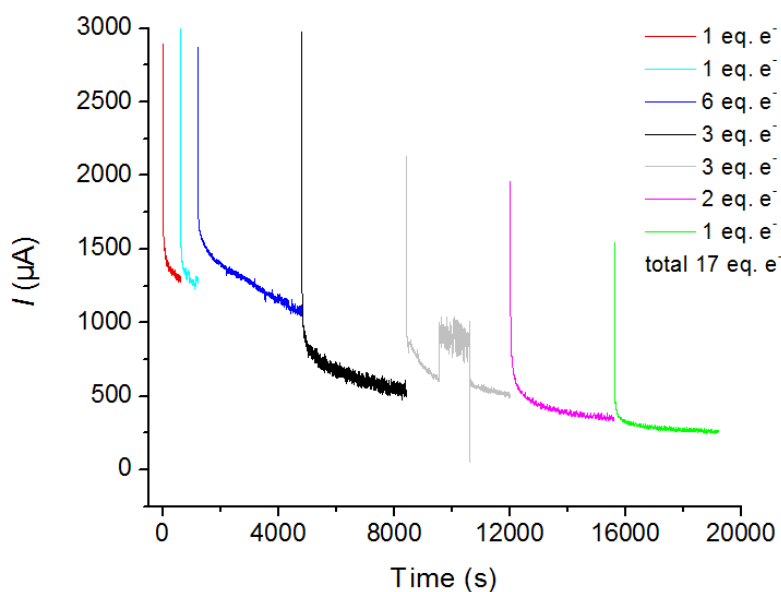

**Figure S30.** CPE at  $E_{\text{app}} = 1.65$  V vs. NHE of a solution of  $\mathbf{1}^{2+}$  (1 mM, 6 mL, pH 1 (TA:TFE/2:1); 8.04  $\mu\text{mol}$ ) using a Pt net electrode (simple cylindrical Pt net electrode, diameter: 10 mm and cylinder height: 30 mm) as a working electrode, Hg/Hg<sub>2</sub>SO<sub>4</sub> as reference electrode and a Pt mesh as auxiliary electrode (simple square mesh net 20\*20 mm). The charge passed was integrated to be 13.52 C, giving 16.8 equivalents of electrons.

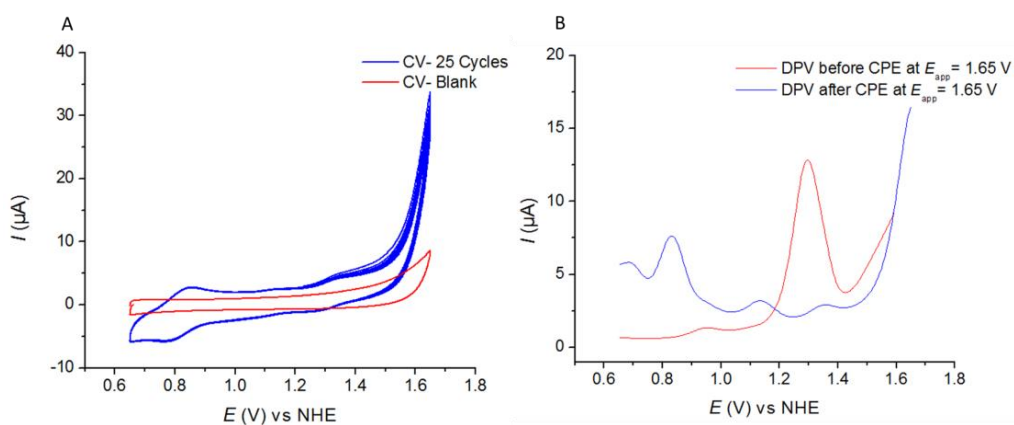

**Figure S31.** A) 25 Consecutive CVs after CPE at  $E_{\text{app}} = 1.65$  V (Figure S30) in a solution of  $1^{2+}$  at pH 1 (TA:TFE (2:1), [TA]= 0.1 M) at scan rate 100 mV/s that generates complex  $4^{2+}$ . B) DPV of  $1^{2+}$  (1 mM) before and after CPE. WE: glassy carbon electrode; CE: platinum electrode; RE: Hg/Hg<sub>2</sub>SO<sub>4</sub>. Black arrows show the scan direction.



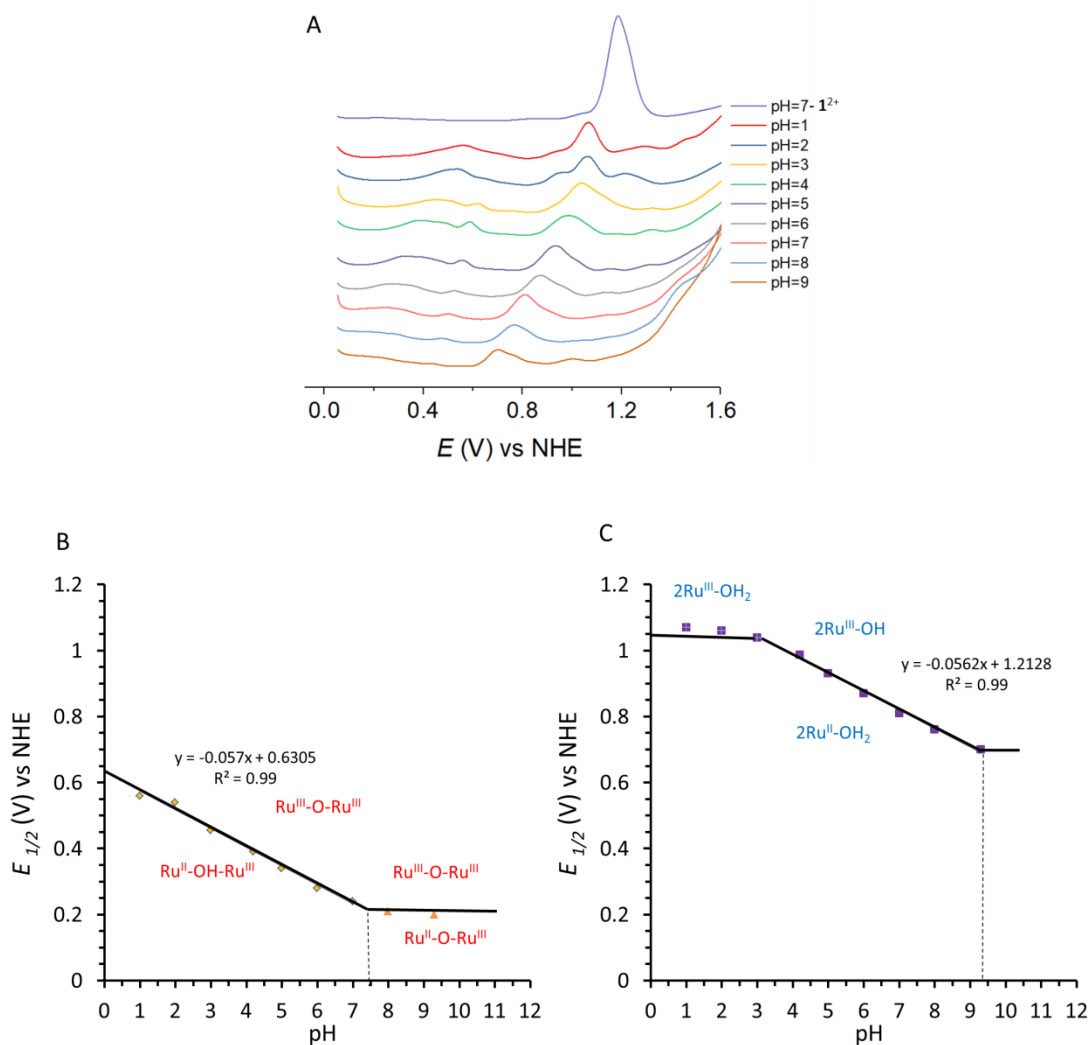

**Figure S32.** A) DPV of  $1^{2+}$  before CPE at pH 7 (light purple) and DPVs after CPE at  $E_{app} = 1.45$  V at different pH values (pH 1-9), the pH of CPE solution was changed from 7 to 1 and from 7 to 12 gradually by adding phosphoric acid and concentrated NaOH, respectively. DPV was measured at each different pH and the redox waves were taken from DPVs. B) Pourbaix diagram for  $3^{4+}$  after CPE at  $E_{app} = 1.45$  V in a phbf aqueous solution at pH 7, C) Pourbaix diagram for  $4^{2+}$  after CPE at  $E_{app} = 1.45$  V in a phosphate buffer solution at pH 7.

## Crystallographic data

**Table S5.** Crystal data and structure refinement for **1Cl<sub>2</sub>**.

|                                   |                                                                                  |                 |
|-----------------------------------|----------------------------------------------------------------------------------|-----------------|
| Identification code               | mo_Abi3903b_0m                                                                   |                 |
| Empirical formula                 | C <sub>76</sub> H <sub>64</sub> Cl <sub>12</sub> N <sub>12</sub> Ru <sub>2</sub> |                 |
| Formula weight                    | 1772.93                                                                          |                 |
| Temperature                       | 100(2)K                                                                          |                 |
| Wavelength                        | 0.71073 Å                                                                        |                 |
| Crystal system                    | monoclinic                                                                       |                 |
| Space group                       | <i>P</i> 2 <sub>1</sub>                                                          |                 |
| Unit cell dimensions              | a = 10.6462(13)Å                                                                 | a = 90°.        |
|                                   | b = 9.5942(13)Å                                                                  | b = 98.317(5)°. |
|                                   | c = 17.992(2)Å                                                                   | γ = 90°.        |
| Volume                            | 1818.4(4) Å <sup>3</sup>                                                         |                 |
| Z                                 | 1                                                                                |                 |
| Density (calculated)              | 1.619 Mg/m <sup>3</sup>                                                          |                 |
| Absorption coefficient            | 0.911 mm <sup>-1</sup>                                                           |                 |
| F(000)                            | 896                                                                              |                 |
| Crystal size                      | 0.150 x 0.100 x 0.050 mm <sup>3</sup>                                            |                 |
| Theta range for data collection   | 1.144 to 25.426°.                                                                |                 |
| Index ranges                      | -12 ≤ h ≤ 12, -9 ≤ k ≤ 11, -21 ≤ l ≤ 21                                          |                 |
| Reflections collected             | 14827                                                                            |                 |
| Independent reflections           | 6104[R(int) = 0.0681]                                                            |                 |
| Completeness to theta =25.426°    | 99.1%                                                                            |                 |
| Absorption correction             | Multi-scan                                                                       |                 |
| Max. and min. transmission        | 0.74 and 0.55                                                                    |                 |
| Refinement method                 | Full-matrix least-squares on F <sup>2</sup>                                      |                 |
| Data / restraints / parameters    | 6104/ 49/ 463                                                                    |                 |
| Goodness-of-fit on F <sup>2</sup> | 1.032                                                                            |                 |
| Final R indices [I>2σ(I)]         | R1 = 0.0544, wR2 = 0.1095                                                        |                 |
| R indices (all data)              | R1 = 0.0732, wR2 = 0.1172                                                        |                 |
| Largest diff. peak and hole       | 1.148 and -0.566 e.Å <sup>-3</sup>                                               |                 |

**Table S6.** Bond lengths [Å] and angles [°] for **1Cl<sub>2</sub>**.

## Bond lengths----

|     |     |           |     |     |           |     |      |           |
|-----|-----|-----------|-----|-----|-----------|-----|------|-----------|
| Ru1 | N2  | 1.942(7)  | C2  | C3  | 1.359(14) | C19 | C22  | 1.400(13) |
| Ru1 | N3  | 1.960(7)  | C3  | C4  | 1.417(14) | C19 | C20  | 1.424(12) |
| Ru1 | N6  | 2.088(7)  | C4  | C5  | 1.405(12) | C20 | C21  | 1.346(14) |
| Ru1 | N5  | 2.088(7)  | C4  | C9  | 1.426(13) | C22 | C23  | 1.372(14) |
| Ru1 | N4  | 2.188(8)  | C5  | C6  | 1.411(15) | C23 | C24  | 1.404(13) |
| Ru1 | N1  | 2.202(8)  | C6  | C7  | 1.409(13) | C25 | C26  | 1.367(12) |
| N1  | C1  | 1.319(12) | C7  | C10 | 1.394(14) | C26 | C27  | 1.389(13) |
| N1  | C5  | 1.380(12) | C7  | C8  | 1.431(14) | C27 | C28  | 1.384(14) |
| N2  | C12 | 1.354(12) | C8  | C9  | 1.346(14) | C27 | C30  | 1.511(12) |
| N2  | C6  | 1.361(12) | C10 | C11 | 1.394(13) | C28 | C29  | 1.378(12) |
| N3  | C17 | 1.334(11) | C11 | C12 | 1.404(13) | C31 | C32  | 1.377(13) |
| N3  | C13 | 1.335(11) | C12 | C13 | 1.475(13) | C32 | C33  | 1.404(14) |
| N4  | C24 | 1.313(11) | C13 | C14 | 1.407(13) | C33 | C34  | 1.371(13) |
| N4  | C18 | 1.387(12) | C14 | C15 | 1.384(13) | C33 | C36  | 1.522(13) |
| N5  | C25 | 1.337(11) | C15 | C16 | 1.409(13) | C34 | C35  | 1.379(13) |
| N5  | C29 | 1.346(11) | C16 | C17 | 1.396(12) | C15 | C15  | 1.766(11) |
| N6  | C35 | 1.339(11) | C16 | C21 | 1.435(13) | C15 | C15  | 1.780(11) |
| N6  | C31 | 1.344(12) | C17 | C18 | 1.436(14) | C25 | C145 | 1.773(12) |
| C1  | C2  | 1.413(13) | C18 | C19 | 1.406(12) | C25 | C135 | 1.774(11) |

## Angles-----

|     |     |     |          |     |     |     |           |     |     |     |           |
|-----|-----|-----|----------|-----|-----|-----|-----------|-----|-----|-----|-----------|
| N6  | Ru1 | N1  | 87.8(3)  | N1  | C5  | C4  | 123.5(10) | N4  | C18 | C19 | 124.7(10) |
| N5  | Ru1 | N1  | 88.7(3)  | N1  | C5  | C6  | 118.7(8)  | N4  | C18 | C17 | 117.5(7)  |
| N4  | Ru1 | N1  | 122.5(3) | C4  | C5  | C6  | 117.8(9)  | C19 | C18 | C17 | 117.8(9)  |
| C1  | N1  | C5  | 117.8(8) | N2  | C6  | C7  | 120.8(9)  | C22 | C19 | C18 | 116.6(9)  |
| C1  | N1  | Ru1 | 134.6(7) | N2  | C6  | C5  | 115.5(9)  | C22 | C19 | C20 | 124.8(9)  |
| C5  | N1  | Ru1 | 107.5(6) | C7  | C6  | C5  | 123.8(9)  | C18 | C19 | C20 | 118.5(9)  |
| C12 | N2  | C6  | 121.9(8) | C10 | C7  | C6  | 117.6(9)  | C21 | C20 | C19 | 123.6(9)  |
| C12 | N2  | Ru1 | 119.4(6) | C10 | C7  | C8  | 126.3(9)  | C20 | C21 | C16 | 119.5(9)  |
| C6  | N2  | Ru1 | 118.7(7) | C6  | C7  | C8  | 116.1(10) | C23 | C22 | C19 | 118.6(9)  |
| C17 | N3  | C13 | 122.4(8) | C9  | C8  | C7  | 121.2(10) | C22 | C23 | C24 | 121.1(9)  |
| C17 | N3  | Ru1 | 118.7(6) | C8  | C9  | C4  | 122.4(10) | N4  | C24 | C23 | 122.8(9)  |
| C13 | N3  | Ru1 | 118.9(6) | C11 | C10 | C7  | 121.0(10) | N5  | C25 | C26 | 124.6(9)  |
| C24 | N4  | C18 | 116.2(8) | C10 | C11 | C12 | 119.2(10) | C25 | C26 | C27 | 119.1(9)  |

|     |    |     |           |     |     |     |          |      |     |      |          |
|-----|----|-----|-----------|-----|-----|-----|----------|------|-----|------|----------|
| C24 | N4 | Ru1 | 135.5(6)  | N2  | C12 | C11 | 119.5(9) | C28  | C27 | C26  | 117.2(8) |
| C18 | N4 | Ru1 | 108.3(6)  | N2  | C12 | C13 | 111.0(8) | C28  | C27 | C30  | 122.2(9) |
| C25 | N5 | C29 | 116.0(8)  | C11 | C12 | C13 | 129.4(9) | C26  | C27 | C30  | 120.5(9) |
| C25 | N5 | Ru1 | 119.7(6)  | N3  | C13 | C14 | 119.6(8) | C29  | C28 | C27  | 119.8(9) |
| C29 | N5 | Ru1 | 124.3(6)  | N3  | C13 | C12 | 112.2(8) | N5   | C29 | C28  | 123.2(9) |
| C35 | N6 | C31 | 116.6(8)  | C14 | C13 | C12 | 128.1(9) | N6   | C31 | C32  | 124.0(9) |
| C35 | N6 | Ru1 | 118.6(6)  | C15 | C14 | C13 | 118.7(9) | C31  | C32 | C33  | 118.5(9) |
| C31 | N6 | Ru1 | 124.8(6)  | C14 | C15 | C16 | 121.0(9) | C34  | C33 | C32  | 117.4(8) |
| N1  | C1 | C2  | 122.5(10) | C17 | C16 | C15 | 116.6(9) | C34  | C33 | C36  | 121.7(8) |
| C3  | C2 | C1  | 119.9(10) | C17 | C16 | C21 | 118.2(9) | C32  | C33 | C36  | 120.9(9) |
| C2  | C3 | C4  | 119.9(9)  | C15 | C16 | C21 | 125.2(9) | C33  | C34 | C35  | 120.3(8) |
| C5  | C4 | C3  | 116.4(10) | N3  | C17 | C16 | 121.7(9) | N6   | C35 | C34  | 123.0(9) |
| C5  | C4 | C9  | 118.8(10) | N3  | C17 | C18 | 115.9(8) | Cl15 | C15 | Cl25 | 109.7(6) |
| C3  | C4 | C9  | 124.8(9)  | C16 | C17 | C18 | 122.4(8) | Cl45 | C25 | Cl35 | 110.2(5) |

**Table S7.** Torsion angles [°] for **1Cl<sub>2</sub>**.

|     |    |    |    |           |     |     |     |     |           |
|-----|----|----|----|-----------|-----|-----|-----|-----|-----------|
| C5  | N1 | C1 | C2 | 0.9(13)   | C14 | C15 | C16 | C21 | 179.9(8)  |
| Ru1 | N1 | C1 | C2 | -176.2(7) | C13 | N3  | C17 | C16 | 1.4(13)   |
| N1  | C1 | C2 | C3 | -1.9(14)  | Ru1 | N3  | C17 | C16 | 178.8(6)  |
| C1  | C2 | C3 | C4 | 1.4(14)   | C13 | N3  | C17 | C18 | 179.0(7)  |
| C2  | C3 | C4 | C5 | 0.0(13)   | Ru1 | N3  | C17 | C18 | -3.6(10)  |
| C2  | C3 | C4 | C9 | -179.2(9) | C15 | C16 | C17 | N3  | -0.2(13)  |
| C1  | N1 | C5 | C4 | 0.7(12)   | C21 | C16 | C17 | N3  | 179.0(8)  |
| Ru1 | N1 | C5 | C4 | 178.5(7)  | C15 | C16 | C17 | C18 | -177.6(8) |
| C1  | N1 | C5 | C6 | 178.9(8)  | C21 | C16 | C17 | C18 | 1.6(13)   |
| Ru1 | N1 | C5 | C6 | -3.3(9)   | C24 | N4  | C18 | C19 | 0.7(12)   |
| C3  | C4 | C5 | N1 | -1.1(12)  | Ru1 | N4  | C18 | C19 | -178.4(6) |
| C9  | C4 | C5 | N1 | 178.2(8)  | C24 | N4  | C18 | C17 | -179.2(7) |
| C3  | C4 | C5 | C6 | -179.3(8) | Ru1 | N4  | C18 | C17 | 1.7(8)    |
| C9  | C4 | C5 | C6 | 0.0(12)   | N3  | C17 | C18 | N4  | 0.9(11)   |
| C12 | N2 | C6 | C7 | 0.2(13)   | C16 | C17 | C18 | N4  | 178.5(8)  |
| Ru1 | N2 | C6 | C7 | -178.2(7) | N3  | C17 | C18 | C19 | -178.9(7) |
| C12 | N2 | C6 | C5 | 179.8(8)  | C16 | C17 | C18 | C19 | -1.4(12)  |
| Ru1 | N2 | C6 | C5 | 1.4(10)   | N4  | C18 | C19 | C22 | -1.1(12)  |
| N1  | C5 | C6 | N2 | 1.6(12)   | C17 | C18 | C19 | C22 | 178.8(7)  |
| C4  | C5 | C6 | N2 | 179.9(7)  | N4  | C18 | C19 | C20 | -179.9(7) |
| N1  | C5 | C6 | C7 | -178.7(8) | C17 | C18 | C19 | C20 | 0.0(11)   |
| C4  | C5 | C6 | C7 | -0.4(13)  | C22 | C19 | C20 | C21 | -177.5(9) |

|     |     |     |     |            |     |     |     |     |           |
|-----|-----|-----|-----|------------|-----|-----|-----|-----|-----------|
| N2  | C6  | C7  | C10 | -1.4(13)   | C18 | C19 | C20 | C21 | 1.1(13)   |
| C5  | C6  | C7  | C10 | 179.0(8)   | C19 | C20 | C21 | C16 | -0.9(14)  |
| N2  | C6  | C7  | C8  | 179.6(8)   | C17 | C16 | C21 | C20 | -0.4(13)  |
| C5  | C6  | C7  | C8  | 0.0(14)    | C15 | C16 | C21 | C20 | 178.7(9)  |
| C10 | C7  | C8  | C9  | -177.9(9)  | C18 | C19 | C22 | C23 | 1.6(12)   |
| C6  | C7  | C8  | C9  | 1.0(14)    | C20 | C19 | C22 | C23 | -179.7(8) |
| C7  | C8  | C9  | C4  | -1.5(15)   | C19 | C22 | C23 | C24 | -1.9(13)  |
| C5  | C4  | C9  | C8  | 1.0(14)    | C18 | N4  | C24 | C23 | -0.9(12)  |
| C3  | C4  | C9  | C8  | -179.8(10) | Ru1 | N4  | C24 | C23 | 177.9(6)  |
| C6  | C7  | C10 | C11 | 2.1(14)    | C22 | C23 | C24 | N4  | 1.6(14)   |
| C8  | C7  | C10 | C11 | -179.0(9)  | C29 | N5  | C25 | C26 | 0.4(13)   |
| C7  | C10 | C11 | C12 | -1.7(13)   | Ru1 | N5  | C25 | C26 | -178.8(7) |
| C6  | N2  | C12 | C11 | 0.4(12)    | N5  | C25 | C26 | C27 | -0.6(14)  |
| Ru1 | N2  | C12 | C11 | 178.7(6)   | C25 | C26 | C27 | C28 | 0.7(13)   |
| C6  | N2  | C12 | C13 | -177.2(7)  | C25 | C26 | C27 | C30 | 178.8(8)  |
| Ru1 | N2  | C12 | C13 | 1.2(9)     | C26 | C27 | C28 | C29 | -0.7(13)  |
| C10 | C11 | C12 | N2  | 0.4(12)    | C30 | C27 | C28 | C29 | -178.7(9) |
| C10 | C11 | C12 | C13 | 177.5(9)   | C25 | N5  | C29 | C28 | -0.4(13)  |
| C17 | N3  | C13 | C14 | -1.4(13)   | Ru1 | N5  | C29 | C28 | 178.8(7)  |
| Ru1 | N3  | C13 | C14 | -178.8(6)  | C27 | C28 | C29 | N5  | 0.6(14)   |
| C17 | N3  | C13 | C12 | 176.1(7)   | C35 | N6  | C31 | C32 | 1.5(13)   |
| Ru1 | N3  | C13 | C12 | -1.2(10)   | Ru1 | N6  | C31 | C32 | -178.2(7) |
| N2  | C12 | C13 | N3  | 0.1(10)    | N6  | C31 | C32 | C33 | -3.5(15)  |
| C11 | C12 | C13 | N3  | -177.2(8)  | C31 | C32 | C33 | C34 | 3.0(14)   |
| N2  | C12 | C13 | C14 | 177.4(8)   | C31 | C32 | C33 | C36 | -178.5(9) |
| C11 | C12 | C13 | C14 | 0.1(15)    | C32 | C33 | C34 | C35 | -0.9(14)  |
| N3  | C13 | C14 | C15 | 0.2(12)    | C36 | C33 | C34 | C35 | -179.4(9) |
| C12 | C13 | C14 | C15 | -176.9(8)  | C31 | N6  | C35 | C34 | 0.8(13)   |
| C13 | C14 | C15 | C16 | 1.0(13)    | Ru1 | N6  | C35 | C34 | -179.5(7) |
| C14 | C15 | C16 | C17 | -1.0(13)   | C33 | C34 | C35 | N6  | -1.1(15)  |

Symmetry operations: 1 'x, y, z'; 2 '-x, y+1/2, -z'

**Table S8.** Crystal data and structure refinement for  $4(\text{CF}_3\text{SO}_3)_2$ .

|                                   |                                             |                   |
|-----------------------------------|---------------------------------------------|-------------------|
| Identification code               | mo_Abi914_0m                                |                   |
| Empirical formula                 | C33.60 H27.80 F6 N5 O7.80 Ru S2             |                   |
| Formula weight                    | 905.60                                      |                   |
| Temperature                       | 100(2)K                                     |                   |
| Wavelength                        | 0.71073 Å                                   |                   |
| Crystal system                    | monoclinic                                  |                   |
| Space group                       | C2/c                                        |                   |
| Unit cell dimensions              | a = 23.8599(17)Å                            | a = 90°.          |
|                                   | b = 13.0679(9)Å                             | b = 93.5948(19)°. |
|                                   | c = 26.5063(18)Å                            | γ = 90°.          |
| Volume                            | 8248.4(10) Å <sup>3</sup>                   |                   |
| Z                                 | 8                                           |                   |
| Density (calculated)              | 1.458 Mg/m <sup>3</sup>                     |                   |
| Absorption coefficient            | 0.559 mm <sup>-1</sup>                      |                   |
| F(000)                            | 3654                                        |                   |
| Crystal size                      | 0.100 x 0.050 x 0.010 mm <sup>3</sup>       |                   |
| Theta range for data collection   | 1.710 to 27.922°.                           |                   |
| Index ranges                      | -31 ≤ h ≤ 31, -17 ≤ k ≤ 14, -34 ≤ l ≤ 33    |                   |
| Reflections collected             | 64035                                       |                   |
| Independent reflections           | 9835[R(int) = 0.0570]                       |                   |
| Completeness to theta =27.922°    | 99.6%                                       |                   |
| Absorption correction             | Multi-scan                                  |                   |
| Max. and min. transmission        | 0.74 and 0.46                               |                   |
| Refinement method                 | Full-matrix least-squares on F <sup>2</sup> |                   |
| Data / restraints / parameters    | 9835/ 2080/ 912                             |                   |
| Goodness-of-fit on F <sup>2</sup> | 1.082                                       |                   |
| Final R indices [I>2sigma(I)]     | R1 = 0.0735, wR2 = 0.2088                   |                   |
| R indices (all data)              | R1 = 0.0962, wR2 = 0.2302                   |                   |
| Largest diff. peak and hole       | 1.345 and -0.784 e.Å <sup>-3</sup>          |                   |

**Table S9.** Bond lengths [Å] and angles [°] for **4**(CF<sub>3</sub>SO<sub>3</sub>)<sub>2</sub>.

Bond lengths----

|     |      |           |      |      |           |      |      |           |
|-----|------|-----------|------|------|-----------|------|------|-----------|
| Ru1 | N2'  | 1.927(7)  | C8'  | C10' | 1.444(9)  | C1B  | F1B  | 1.311(8)  |
| Ru1 | N3   | 1.936(4)  | C10' | C11' | 1.346(10) | C1B  | F2B  | 1.319(8)  |
| Ru1 | N2   | 1.980(15) | C11' | C12' | 1.420(8)  | C1B  | F3B  | 1.330(8)  |
| Ru1 | N5   | 2.061(4)  | C12' | C13  | 1.493(10) | S1B' | O3B' | 1.440(10) |
| Ru1 | O1   | 2.104(4)  | N3   | C13  | 1.352(7)  | S1B' | O2B' | 1.450(10) |
| Ru1 | N4   | 2.168(4)  | N3   | C17  | 1.357(7)  | S1B' | O1B' | 1.455(10) |
| Ru1 | N1'  | 2.173(7)  | N4   | C24  | 1.322(7)  | S1B' | C1B' | 1.828(10) |
| Ru1 | N1   | 2.179(15) | N4   | C21  | 1.374(7)  | O1B' | O3B' | 1.66(4)   |
| N1  | C1   | 1.346(10) | C13  | C14  | 1.420(8)  | C1B' | F3B' | 1.311(10) |
| N1  | C4   | 1.382(9)  | C14  | C15  | 1.384(10) | C1B' | F2B' | 1.319(10) |
| N2  | C9   | 1.350(9)  | C15  | C16  | 1.384(10) | C1B' | F1B' | 1.326(10) |
| N2  | C12  | 1.355(10) | C16  | C17  | 1.391(8)  | S1A  | O2A  | 1.413(9)  |
| C1  | C2   | 1.433(11) | C16  | C18  | 1.422(9)  | S1A  | O3A  | 1.420(9)  |
| C2  | C3   | 1.344(12) | C17  | C21  | 1.428(8)  | S1A  | O1A  | 1.433(9)  |
| C3  | C5   | 1.429(10) | C18  | C19  | 1.351(10) | S1A  | C1A  | 1.812(10) |
| C4  | C5   | 13.900    | C19  | C20  | 1.454(9)  | O2A  | C1A  | 1.82(2)   |
| C4  | C9   | 13.900    | C20  | C22  | 1.396(9)  | C1A  | F1A  | 1.304(9)  |
| C5  | C6   | 13.900    | C20  | C21  | 1.403(7)  | C1A  | F2A  | 1.310(9)  |
| C6  | C7   | 13.900    | C22  | C23  | 1.335(9)  | C1A  | F3A  | 1.323(10) |
| C7  | C8   | 13.900    | C23  | C24  | 1.422(7)  | S1A' | O3A' | 1.450(6)  |
| C8  | C9   | 13.900    | N5   | C29' | 1.23(4)   | S1A' | O2A' | 1.459(7)  |
| C8  | C10  | 1.452(10) | N5   | C25' | 1.34(3)   | S1A' | O1A' | 1.479(7)  |
| C10 | C11  | 1.341(11) | N5   | C25  | 1.350(14) | S1A' | C1A' | 1.837(9)  |
| C11 | C12  | 1.420(10) | N5   | C29  | 1.373(19) | C1A' | F3A' | 1.325(8)  |
| C12 | C13  | 1.423(17) | C25  | C26  | 1.402(17) | C1A' | F1A' | 1.333(8)  |
| N1' | C1'  | 1.347(8)  | C26  | C27  | 1.368(14) | C1A' | F2A' | 1.354(9)  |
| N1' | C4'  | 1.375(7)  | C27  | C28  | 1.347(17) | O1S  | C1S  | 1.432(10) |
| N2' | C9'  | 1.352(7)  | C27  | C30  | 1.524(16) | O1S  | C3S  | 1.438(10) |
| N2' | C12' | 1.354(8)  | C28  | C29  | 1.355(19) | C1S  | C2S  | 1.539(10) |
| C1' | C2'  | 1.430(9)  | C25' | C26' | 1.36(3)   | C3S  | C4S  | 1.541(10) |
| C2' | C3'  | 1.347(10) | C26' | C27' | 1.38(3)   | O1S' | C1S' | 1.424(10) |
| C3' | C5'  | 1.422(9)  | C27' | C28' | 1.35(3)   | O1S' | C3S' | 1.427(10) |
| C4' | C5'  | 1.392(7)  | C27' | C30' | 1.57(3)   | C1S' | C2S' | 1.541(10) |

|     |     |          |      |      |          |      |       |                |
|-----|-----|----------|------|------|----------|------|-------|----------------|
| C4' | C9' | 1.407(7) | C28' | C29' | 1.44(4)  | C1S' | C3S'  | 1.92(6)        |
| C5' | C6' | 1.421(7) | S1B  | O1B  | 1.399(4) | C3S' | C4S'  | 1.539(10)      |
| C6' | C7' | 1.375(8) | S1B  | O3B  | 1.421(5) | O1W  | O1W#  | 1.79(6) 2_656  |
| C7' | C8' | 1.408(7) | S1B  | O2B  | 1.460(5) | O1W" | O1W"# | 1.28(10) 2_656 |
| C8' | C9' | 1.397(7) | S1B  | C1B  | 1.792(7) |      |       |                |

Angles-----

|     |     |     |            |      |      |      |          |      |      |      |           |
|-----|-----|-----|------------|------|------|------|----------|------|------|------|-----------|
| N2' | Ru1 | N3  | 79.9(2)    | C4'  | C5'  | C3'  | 117.0(6) | O1B  | S1B  | O3B  | 118.1(4)  |
| N3  | Ru1 | N2  | 77.0(4)    | C6'  | C5'  | C3'  | 124.3(6) | O1B  | S1B  | O2B  | 115.7(3)  |
| N2' | Ru1 | N5  | 96.0(3)    | C7'  | C6'  | C5'  | 122.2(6) | O3B  | S1B  | O2B  | 113.2(4)  |
| N3  | Ru1 | N5  | 91.70(17)  | C6'  | C7'  | C8'  | 119.7(6) | O1B  | S1B  | C1B  | 101.9(4)  |
| N2  | Ru1 | N5  | 87.6(7)    | C9'  | C8'  | C7'  | 117.8(6) | O3B  | S1B  | C1B  | 102.7(4)  |
| N2' | Ru1 | O1  | 87.7(3)    | C9'  | C8'  | C10' | 116.3(6) | O2B  | S1B  | C1B  | 102.0(5)  |
| N3  | Ru1 | O1  | 91.47(16)  | C7'  | C8'  | C10' | 125.9(6) | F1B  | C1B  | F2B  | 110.5(7)  |
| N2  | Ru1 | O1  | 96.3(7)    | N2'  | C9'  | C8'  | 121.6(6) | F1B  | C1B  | F3B  | 109.3(7)  |
| N5  | Ru1 | O1  | 175.50(15) | N2'  | C9'  | C4'  | 115.3(5) | F2B  | C1B  | F3B  | 107.7(7)  |
| N2' | Ru1 | N4  | 159.0(2)   | C8'  | C9'  | C4'  | 123.1(6) | F1B  | C1B  | S1B  | 111.3(6)  |
| N3  | Ru1 | N4  | 79.42(17)  | C11' | C10' | C8'  | 120.8(6) | F2B  | C1B  | S1B  | 108.7(6)  |
| N2  | Ru1 | N4  | 155.8(4)   | C10' | C11' | C12' | 120.6(7) | F3B  | C1B  | S1B  | 109.2(6)  |
| N5  | Ru1 | N4  | 87.72(16)  | N2'  | C12' | C11' | 118.3(6) | O3B' | S1B' | O2B' | 113.9(11) |
| O1  | Ru1 | N4  | 89.72(15)  | N2'  | C12' | C13  | 112.0(6) | O3B' | S1B' | O1B' | 70.1(18)  |
| N2' | Ru1 | N1' | 79.1(2)    | C11' | C12' | C13  | 129.5(7) | O2B' | S1B' | O1B' | 113.3(10) |
| N3  | Ru1 | N1' | 158.9(2)   | C13  | N3   | C17  | 121.6(5) | O3B' | S1B' | C1B' | 77.1(16)  |
| N5  | Ru1 | N1' | 91.7(3)    | C13  | N3   | Ru1  | 119.0(4) | O2B' | S1B' | C1B' | 141.4(17) |
| O1  | Ru1 | N1' | 86.5(3)    | C17  | N3   | Ru1  | 119.4(3) | O1B' | S1B' | C1B' | 105.3(15) |
| N4  | Ru1 | N1' | 121.5(2)   | C24  | N4   | C21  | 117.9(4) | S1B' | O1B' | O3B' | 54.5(10)  |
| N3  | Ru1 | N1  | 154.6(4)   | C24  | N4   | Ru1  | 133.1(4) | S1B' | O3B' | O1B' | 55.4(10)  |
| N2  | Ru1 | N1  | 77.8(5)    | C21  | N4   | Ru1  | 109.0(3) | F3B' | C1B' | F2B' | 109.8(11) |
| N5  | Ru1 | N1  | 84.4(6)    | N3   | C13  | C14  | 118.9(6) | F3B' | C1B' | F1B' | 109.5(11) |
| O1  | Ru1 | N1  | 94.1(6)    | N3   | C13  | C12  | 113.9(8) | F2B' | C1B' | F1B' | 107.8(11) |
| N4  | Ru1 | N1  | 125.3(4)   | C14  | C13  | C12  | 126.3(8) | F3B' | C1B' | S1B' | 119(2)    |
| C1  | N1  | C4  | 118.7(9)   | N3   | C13  | C12' | 110.6(5) | F2B' | C1B' | S1B' | 110(2)    |
| C1  | N1  | Ru1 | 130.7(9)   | C14  | C13  | C12' | 130.5(6) | F1B' | C1B' | S1B' | 99.9(19)  |
| C4  | N1  | Ru1 | 110.1(7)   | C15  | C14  | C13  | 118.0(6) | O2A  | S1A  | O3A  | 118.4(9)  |
| C9  | N2  | C12 | 121.7(9)   | C14  | C15  | C16  | 123.2(6) | O2A  | S1A  | O1A  | 116.0(8)  |
| C9  | N2  | Ru1 | 117.6(8)   | C15  | C16  | C17  | 115.9(5) | O3A  | S1A  | O1A  | 125.2(12) |



|      |     |      |           |      |      |      |           |      |      |      |           |
|------|-----|------|-----------|------|------|------|-----------|------|------|------|-----------|
| C12  | N2  | Ru1  | 119.6(9)  | C15  | C16  | C18  | 127.7(6)  | O2A  | S1A  | C1A  | 67.4(10)  |
| N1   | C1  | C2   | 120.2(11) | C17  | C16  | C18  | 116.3(6)  | O3A  | S1A  | C1A  | 99.5(13)  |
| C3   | C2  | C1   | 120.6(11) | N3   | C17  | C16  | 122.3(5)  | O1A  | S1A  | C1A  | 106.2(12) |
| C2   | C3  | C5   | 120.4(10) | N3   | C17  | C21  | 114.2(5)  | S1A  | O2A  | C1A  | 66.8(7)   |
| N1   | C4  | C5   | 123.4(6)  | C16  | C17  | C21  | 123.4(5)  | F1A  | C1A  | F2A  | 110.1(10) |
| N1   | C4  | C9   | 116.5(6)  | C19  | C18  | C16  | 121.9(6)  | F1A  | C1A  | F3A  | 110.6(10) |
| C5   | C4  | C9   | 120.0     | C18  | C19  | C20  | 122.3(6)  | F2A  | C1A  | F3A  | 109.6(10) |
| C4   | C5  | C6   | 120.0     | C22  | C20  | C21  | 117.3(6)  | F1A  | C1A  | S1A  | 110.2(12) |
| C4   | C5  | C3   | 116.5(7)  | C22  | C20  | C19  | 125.9(5)  | F2A  | C1A  | S1A  | 111.7(12) |
| C6   | C5  | C3   | 123.5(7)  | C21  | C20  | C19  | 116.8(6)  | F3A  | C1A  | S1A  | 104.5(14) |
| C7   | C6  | C5   | 120.0     | N4   | C21  | C20  | 122.9(5)  | F1A  | C1A  | O2A  | 79.7(10)  |
| C8   | C7  | C6   | 120.0     | N4   | C21  | C17  | 117.9(4)  | F2A  | C1A  | O2A  | 92.6(11)  |
| C9   | C8  | C7   | 120.0     | C20  | C21  | C17  | 119.2(5)  | F3A  | C1A  | O2A  | 149.1(14) |
| C9   | C8  | C10  | 115.1(7)  | C23  | C22  | C20  | 119.9(5)  | S1A  | C1A  | O2A  | 45.8(4)   |
| C7   | C8  | C10  | 124.8(7)  | C22  | C23  | C24  | 120.5(6)  | O3A' | S1A' | O2A' | 109.4(6)  |
| N2   | C9  | C8   | 122.9(6)  | N4   | C24  | C23  | 121.4(5)  | O3A' | S1A' | O1A' | 111.4(6)  |
| N2   | C9  | C4   | 116.7(6)  | C29' | N5   | C25' | 123(2)    | O2A' | S1A' | O1A' | 109.0(6)  |
| C8   | C9  | C4   | 120.0     | C25  | N5   | C29  | 114.4(11) | O3A' | S1A' | C1A' | 99.5(7)   |
| C11  | C10 | C8   | 121.0(10) | C29' | N5   | Ru1  | 118.6(15) | O2A' | S1A' | C1A' | 127.5(7)  |
| C10  | C11 | C12  | 121.1(11) | C25' | N5   | Ru1  | 117.6(12) | O1A' | S1A' | C1A' | 99.4(6)   |
| N2   | C12 | C11  | 117.9(10) | C25  | N5   | Ru1  | 117.8(7)  | F3A' | C1A' | F1A' | 106.2(8)  |
| N2   | C12 | C13  | 110.1(11) | C29  | N5   | Ru1  | 127.1(8)  | F3A' | C1A' | F2A' | 108.8(8)  |
| C11  | C12 | C13  | 131.7(11) | N5   | C25  | C26  | 122.7(11) | F1A' | C1A' | F2A' | 106.6(8)  |
| C1'  | N1' | C4'  | 117.5(6)  | C27  | C26  | C25  | 119.9(10) | F3A' | C1A' | S1A' | 112.1(7)  |
| C1'  | N1' | Ru1  | 133.7(5)  | C28  | C27  | C26  | 118.1(11) | F1A' | C1A' | S1A' | 112.5(7)  |
| C4'  | N1' | Ru1  | 108.9(4)  | C28  | C27  | C30  | 121.4(11) | F2A' | C1A' | S1A' | 110.4(8)  |
| C9'  | N2' | C12' | 122.4(6)  | C26  | C27  | C30  | 120.3(10) | C1S  | O1S  | C3S  | 126(4)    |
| C9'  | N2' | Ru1  | 119.2(4)  | C27  | C28  | C29  | 120.2(14) | O1S  | C1S  | C2S  | 119.0(18) |
| C12' | N2' | Ru1  | 118.4(5)  | C28  | C29  | N5   | 124.6(17) | O1S  | C3S  | C4S  | 117.6(17) |
| N1'  | C1' | C2'  | 120.9(7)  | N5   | C25' | C26' | 121(2)    | C1S' | O1S' | C3S' | 85(3)     |
| C3'  | C2' | C1'  | 121.0(7)  | C25' | C26' | C27' | 117.7(18) | O1S' | C1S' | C2S' | 120.8(18) |
| C2'  | C3' | C5'  | 119.3(6)  | C28' | C27' | C26' | 119.9(19) | O1S' | C1S' | C3S' | 47.7(16)  |
| N1'  | C4' | C5'  | 124.3(5)  | C28' | C27' | C30' | 118.5(19) | C2S' | C1S' | C3S' | 168(3)    |
| N1'  | C4' | C9'  | 117.4(5)  | C26' | C27' | C30' | 121.5(17) | O1S' | C3S' | C4S' | 119.7(18) |
| C5'  | C4' | C9'  | 118.3(5)  | C27' | C28' | C29' | 118(3)    | O1S' | C3S' | C1S' | 47.6(16)  |
| C4'  | C5' | C6'  | 118.7(6)  | N5   | C29' | C28' | 120(3)    | C4S' | C3S' | C1S' | 153(5)    |

**Table S10.** Torsion angles [°] for **4**(CF<sub>3</sub>SO<sub>3</sub>)<sub>2</sub>.

|     |     |     |     |            |     |     |     |     |           |
|-----|-----|-----|-----|------------|-----|-----|-----|-----|-----------|
| C4  | N1  | C1  | C2  | 5(3)       | Ru1 | N3  | C17 | C16 | 177.1(4)  |
| Ru1 | N1  | C1  | C2  | 175.7(17)  | C13 | N3  | C17 | C21 | 179.4(5)  |
| N1  | C1  | C2  | C3  | -2(3)      | Ru1 | N3  | C17 | C21 | -2.9(6)   |
| C1  | C2  | C3  | C5  | 0(3)       | C15 | C16 | C17 | N3  | 0.3(9)    |
| C1  | N1  | C4  | C5  | -7(3)      | C18 | C16 | C17 | N3  | -178.8(6) |
| Ru1 | N1  | C4  | C5  | -178.9(9)  | C15 | C16 | C17 | C21 | -179.8(6) |
| C1  | N1  | C4  | C9  | 176.8(17)  | C18 | C16 | C17 | C21 | 1.2(9)    |
| Ru1 | N1  | C4  | C9  | 4.5(17)    | C15 | C16 | C18 | C19 | 179.9(7)  |
| N1  | C4  | C5  | C6  | -176.5(17) | C17 | C16 | C18 | C19 | -1.2(10)  |
| C9  | C4  | C5  | C6  | 0.0        | C16 | C18 | C19 | C20 | 0.0(11)   |
| N1  | C4  | C5  | C3  | 4.3(19)    | C18 | C19 | C20 | C22 | -179.2(7) |
| C9  | C4  | C5  | C3  | -179.2(15) | C18 | C19 | C20 | C21 | 1.2(9)    |
| C2  | C3  | C5  | C4  | -1(2)      | C24 | N4  | C21 | C20 | 0.5(8)    |
| C2  | C3  | C5  | C6  | 180.0(16)  | Ru1 | N4  | C21 | C20 | -177.6(4) |
| C4  | C5  | C6  | C7  | 0.0        | C24 | N4  | C21 | C17 | -179.8(5) |
| C3  | C5  | C6  | C7  | 179.2(17)  | Ru1 | N4  | C21 | C17 | 2.1(6)    |
| C5  | C6  | C7  | C8  | 0.0        | C22 | C20 | C21 | N4  | -1.1(8)   |
| C6  | C7  | C8  | C9  | 0.0        | C19 | C20 | C21 | N4  | 178.6(5)  |
| C6  | C7  | C8  | C10 | 176.6(18)  | C22 | C20 | C21 | C17 | 179.2(5)  |
| C12 | N2  | C9  | C8  | 8(3)       | C19 | C20 | C21 | C17 | -1.1(8)   |
| Ru1 | N2  | C9  | C8  | 175.9(9)   | N3  | C17 | C21 | N4  | 0.2(7)    |
| C12 | N2  | C9  | C4  | -179.5(18) | C16 | C17 | C21 | N4  | -179.8(5) |
| Ru1 | N2  | C9  | C4  | -11(2)     | N3  | C17 | C21 | C20 | 179.9(5)  |
| C7  | C8  | C9  | N2  | 172.5(19)  | C16 | C17 | C21 | C20 | 0.0(9)    |
| C10 | C8  | C9  | N2  | -4.4(19)   | C21 | C20 | C22 | C23 | -0.7(9)   |
| C7  | C8  | C9  | C4  | 0.0        | C19 | C20 | C22 | C23 | 179.6(6)  |
| C10 | C8  | C9  | C4  | -176.9(16) | C20 | C22 | C23 | C24 | 3.0(10)   |
| N1  | C4  | C9  | N2  | 3.7(18)    | C21 | N4  | C24 | C23 | 1.9(8)    |
| C5  | C4  | C9  | N2  | -173.0(18) | Ru1 | N4  | C24 | C23 | 179.4(4)  |
| N1  | C4  | C9  | C8  | 176.7(16)  | C22 | C23 | C24 | N4  | -3.7(9)   |
| C5  | C4  | C9  | C8  | 0.0        | C29 | N5  | C25 | C26 | 0.1(16)   |
| C9  | C8  | C10 | C11 | -1(3)      | Ru1 | N5  | C25 | C26 | -171.4(8) |
| C7  | C8  | C10 | C11 | -177.7(17) | N5  | C25 | C26 | C27 | 0.0(16)   |
| C8  | C10 | C11 | C12 | 3(3)       | C25 | C26 | C27 | C28 | 0.3(17)   |
| C9  | N2  | C12 | C11 | -5(3)      | C25 | C26 | C27 | C30 | 176.0(11) |

|      |     |     |      |            |      |      |      |      |            |
|------|-----|-----|------|------------|------|------|------|------|------------|
| Ru1  | N2  | C12 | C11  | -173.3(17) | C26  | C27  | C28  | C29  | -1(2)      |
| C9   | N2  | C12 | C13  | 169.3(19)  | C30  | C27  | C28  | C29  | -176.4(15) |
| Ru1  | N2  | C12 | C13  | 1(3)       | C27  | C28  | C29  | N5   | 1(3)       |
| C10  | C11 | C12 | N2   | 0(3)       | C25  | N5   | C29  | C28  | -1(2)      |
| C10  | C11 | C12 | C13  | -173(2)    | Ru1  | N5   | C29  | C28  | 170.1(13)  |
| C4'  | N1' | C1' | C2'  | 0.5(13)    | C29' | N5   | C25' | C26' | 6(3)       |
| Ru1  | N1' | C1' | C2'  | -177.2(7)  | Ru1  | N5   | C25' | C26' | 174.2(15)  |
| N1'  | C1' | C2' | C3'  | 0.7(14)    | N5   | C25' | C26' | C27' | -3(3)      |
| C1'  | C2' | C3' | C5'  | -1.7(13)   | C25' | C26' | C27' | C28' | -1(3)      |
| C1'  | N1' | C4' | C5'  | -0.6(12)   | C25' | C26' | C27' | C30' | -176.1(19) |
| Ru1  | N1' | C4' | C5'  | 177.5(7)   | C26' | C27' | C28' | C29' | 1(3)       |
| C1'  | N1' | C4' | C9'  | 179.3(8)   | C30' | C27' | C28' | C29' | 176(2)     |
| Ru1  | N1' | C4' | C9'  | -2.5(9)    | C25' | N5   | C29' | C28' | -6(4)      |
| N1'  | C4' | C5' | C6'  | 177.9(8)   | Ru1  | N5   | C29' | C28' | -174(2)    |
| C9'  | C4' | C5' | C6'  | -2.1(12)   | C27' | C28' | C29' | N5   | 2(4)       |
| N1'  | C4' | C5' | C3'  | -0.3(12)   | O1B  | S1B  | C1B  | F1B  | 54.4(7)    |
| C9'  | C4' | C5' | C3'  | 179.7(8)   | O3B  | S1B  | C1B  | F1B  | -68.3(7)   |
| C2'  | C3' | C5' | C4'  | 1.5(12)    | O2B  | S1B  | C1B  | F1B  | 174.2(6)   |
| C2'  | C3' | C5' | C6'  | -176.6(8)  | O1B  | S1B  | C1B  | F2B  | 176.4(6)   |
| C4'  | C5' | C6' | C7'  | 0.0(13)    | O3B  | S1B  | C1B  | F2B  | 53.6(7)    |
| C3'  | C5' | C6' | C7'  | 178.1(8)   | O2B  | S1B  | C1B  | F2B  | -63.8(7)   |
| C5'  | C6' | C7' | C8'  | 2.5(13)    | O1B  | S1B  | C1B  | F3B  | -66.4(7)   |
| C6'  | C7' | C8' | C9'  | -2.9(13)   | O3B  | S1B  | C1B  | F3B  | 170.9(6)   |
| C6'  | C7' | C8' | C10' | 179.3(8)   | O2B  | S1B  | C1B  | F3B  | 53.5(7)    |
| C12' | N2' | C9' | C8'  | -0.2(13)   | O2B' | S1B' | O1B' | O3B' | 108.3(13)  |
| Ru1  | N2' | C9' | C8'  | -178.7(7)  | C1B' | S1B' | O1B' | O3B' | -69.8(17)  |
| C12' | N2' | C9' | C4'  | -178.7(8)  | O2B' | S1B' | O3B' | O1B' | -107.4(12) |
| Ru1  | N2' | C9' | C4'  | 2.8(10)    | C1B' | S1B' | O3B' | O1B' | 111.8(16)  |
| C7'  | C8' | C9' | N2'  | -177.5(9)  | O3B' | S1B' | C1B' | F3B' | 120(2)     |
| C10' | C8' | C9' | N2'  | 0.5(12)    | O2B' | S1B' | C1B' | F3B' | 7(3)       |
| C7'  | C8' | C9' | C4'  | 0.8(12)    | O1B' | S1B' | C1B' | F3B' | -175(2)    |
| C10' | C8' | C9' | C4'  | 178.9(8)   | O3B' | S1B' | C1B' | F2B' | -8(2)      |
| N1'  | C4' | C9' | N2'  | 0.1(11)    | O2B' | S1B' | C1B' | F2B' | -121(3)    |
| C5'  | C4' | C9' | N2'  | -179.9(8)  | O1B' | S1B' | C1B' | F2B' | 57(2)      |
| N1'  | C4' | C9' | C8'  | -178.3(8)  | O3B' | S1B' | C1B' | F1B' | -121.3(19) |
| C5'  | C4' | C9' | C8'  | 1.7(12)    | O2B' | S1B' | C1B' | F1B' | 126(3)     |

|      |      |      |      |            |      |      |      |      |            |
|------|------|------|------|------------|------|------|------|------|------------|
| C9'  | C8'  | C10' | C11' | -0.7(13)   | O1B' | S1B' | C1B' | F1B' | -56(2)     |
| C7'  | C8'  | C10' | C11' | 177.2(9)   | O3A  | S1A  | O2A  | C1A  | 88.7(17)   |
| C8'  | C10' | C11' | C12' | 0.5(14)    | O1A  | S1A  | O2A  | C1A  | -97.7(15)  |
| C9'  | N2'  | C12' | C11' | 0.0(13)    | O2A  | S1A  | C1A  | F1A  | -51.4(11)  |
| Ru1  | N2'  | C12' | C11' | 178.5(7)   | O3A  | S1A  | C1A  | F1A  | -168.3(13) |
| C9'  | N2'  | C12' | C13  | -175.7(8)  | O1A  | S1A  | C1A  | F1A  | 60.6(14)   |
| Ru1  | N2'  | C12' | C13  | 2.7(10)    | O2A  | S1A  | C1A  | F2A  | 71.4(11)   |
| C10' | C11' | C12' | N2'  | -0.2(14)   | O3A  | S1A  | C1A  | F2A  | -45.5(15)  |
| C10' | C11' | C12' | C13  | 174.7(9)   | O1A  | S1A  | C1A  | F2A  | -176.7(12) |
| C17  | N3   | C13  | C14  | 0.0(9)     | O2A  | S1A  | C1A  | F3A  | -170.2(12) |
| Ru1  | N3   | C13  | C14  | -177.7(5)  | O3A  | S1A  | C1A  | F3A  | 72.9(13)   |
| C17  | N3   | C13  | C12  | 170.0(13)  | O1A  | S1A  | C1A  | F3A  | -58.2(13)  |
| Ru1  | N3   | C13  | C12  | -7.8(14)   | O3A  | S1A  | C1A  | O2A  | -116.9(10) |
| C17  | N3   | C13  | C12' | -178.1(6)  | O1A  | S1A  | C1A  | O2A  | 112.0(9)   |
| Ru1  | N3   | C13  | C12' | 4.1(8)     | S1A  | O2A  | C1A  | F1A  | 131.8(11)  |
| N2   | C12  | C13  | N3   | 4(2)       | S1A  | O2A  | C1A  | F2A  | -118.2(11) |
| C11  | C12  | C13  | N3   | 178(2)     | S1A  | O2A  | C1A  | F3A  | 19(2)      |
| N2   | C12  | C13  | C14  | 172.9(13)  | O3A' | S1A' | C1A' | F3A' | 55.5(9)    |
| C11  | C12  | C13  | C14  | -13(3)     | O2A' | S1A' | C1A' | F3A' | 179.0(8)   |
| N2'  | C12' | C13  | N3   | -4.2(10)   | O1A' | S1A' | C1A' | F3A' | -58.2(8)   |
| C11' | C12' | C13  | N3   | -179.4(9)  | O3A' | S1A' | C1A' | F1A' | 175.2(8)   |
| N2'  | C12' | C13  | C14  | 177.9(7)   | O2A' | S1A' | C1A' | F1A' | -61.4(10)  |
| C11' | C12' | C13  | C14  | 2.7(15)    | O1A' | S1A' | C1A' | F1A' | 61.5(8)    |
| N3   | C13  | C14  | C15  | 1.0(10)    | O3A' | S1A' | C1A' | F2A' | -65.9(8)   |
| C12  | C13  | C14  | C15  | -167.6(15) | O2A' | S1A' | C1A' | F2A' | 57.6(10)   |
| C12' | C13  | C14  | C15  | 178.7(8)   | O1A' | S1A' | C1A' | F2A' | -179.6(7)  |
| C13  | C14  | C15  | C16  | -1.5(11)   | C3S  | O1S  | C1S  | C2S  | 167(5)     |
| C14  | C15  | C16  | C17  | 0.8(11)    | C1S  | O1S  | C3S  | C4S  | -169(7)    |
| C14  | C15  | C16  | C18  | 179.7(7)   | C3S' | O1S' | C1S' | C2S' | 177(7)     |
| C13  | N3   | C17  | C16  | -0.7(8)    | C1S' | O1S' | C3S' | C4S' | 151(6)     |

Symmetry operations:

1 'x, y, z'; 2 '-x, y, -z+1/2'; 3 'x+1/2, y+1/2, z'; 4 '-x+1/2, y+1/2, -z+1/2'; 5 '-x, -y, -z'; 6 'x, -y, z-1/2'; 7 '-x+1/2, -y+1/2, -z'; 8 'x+1/2, -y+1/2, z-1/2'.
